# Supplementary material for: Circularly polarized phosphorescence with a large dissymmetry factor from a helical platinum(ii) complex
Source: Royal Society of Chemistry journal article supplement (doi:10.1039/d3cc06293g), 2024-01-01
Supplement: d3cc06293g1.pdf [file d3cc06293g1.pdf]

## Supporting Information

### **Circularly polarized phosphorescence with large dissymmetry factor from a helical platinum(II) complex**

Masahiro Ikeshita,<sup>‡</sup><sup>a</sup> Shinya Watanabe,<sup>‡</sup><sup>a</sup> Seika Suzuki,<sup>b</sup> Shota Tanaka,<sup>c</sup> Shingo Hattori,<sup>c</sup> Kazuteru Shinozaki,<sup>c</sup> Yoshitane Imai<sup>†b</sup> and Takashi Tsuno<sup>\*a</sup>

<sup>a</sup> Department of Applied Molecular Chemistry, College of Industrial Technology, Nihon University, Narashino, Chiba 275-8575, Japan

<sup>b</sup> Department of Applied Chemistry, Faculty of Science and Engineering, Kindai University, 3-4-1 Kowakae, Higashi-Osaka, Osaka 577-8502, Japan

<sup>c</sup> Graduate School of Nanobioscience, Yokohama City University 22-2 Seto, Kanazawa-ku, Yokohama 236-0027, Japan

<sup>‡</sup> M. I. and S. W. contributed equally to this work

#### **Table of Contents**

- 1. Instrumentation and Materials**
- 2. Synthetic Procedures and Characterization**
- 3. Single Crystal X-ray Diffraction Analysis**
- 4. NMR Analysis**
- 5. Photophysical Properties**
- 6. Computational Details**
- 7. Cartesian Coordinates (in Å)**
- 8. References**

## 1. Instrumentation and Materials

### Instruments

Melting points were measured by a ATM-01 melting temperature measurement device (AS ONE Corporation). IR spectra were acquired with a JASCO FT/IR4100ST spectrometer. High-resolution mass spectrometry was recorded on Bruker micrOTOF II spectrometer.  $^1\text{H}$  and  $^{13}\text{C}$  NMR spectra were recorded on Bruker Avance III 500 spectrometers, TMS as internal standard. Elemental analyses were performed on a YANAKO MT-5 at A-Rabbit-Science Japan Co., Ltd. UV-vis absorption spectra were obtained on a SHIMADZU UV-1900i spectrophotometer. CD spectra were recorded on a Jasco J-720 spectropolarimeter. Emission spectra were obtained on a FP-6500 spectrometer. Emission lifetimes were determined through single-exponential curve-fitting of emission intensity data recorded over time with a Tektronix TDS320 digital oscilloscope after pulsed excitation at 355 nm using a Continuum Surelite Nd:YAG laser. CPL spectra were obtained at room temperature using a JASCO CPL-300 spectrofluoropolarimeter. Optical rotation was measured on a Jasco DIP-370 digital polarimeter.

### Materials

(*R*)- and (*S*)-1-phenylethylamine (Kanto Chemical), potassium *tert*-butoxide (Kanto Chemical), potassium tetrachloroplatinate(II) (Kanto Chemical), 1-phenylisoquinoline (TCI), sodium hydride (dispersion in paraffin liquid) (Kanto Chemical), chloromethyl methyl ether (TCI), *n*-butyllithium (in *n*-hexane, *ca.* 1.6 mol/L) (Kanto Chemical), 2-ethoxyethanol (Fujifilm Wako), dry tetrahydrofuran (Kanto Chemical), dry *N,N*-dimethylformamide (Kanto Chemical), dry toluene (Kanto Chemical) and dry dimethyl sulfoxide (Kanto Chemical) were obtained from commercial sources and were used without further purification. Benzo[*c*]phenanthren-1-ol (**3**)<sup>S1</sup>, Di- $\mu$ -chlorobis[2-(1-isoquinoliny1- $\kappa$ *N*)phenyl- $\kappa$ *C*]diplatinum ([Pt(piq)( $\mu$ -Cl)]<sub>2</sub>)<sup>S2</sup> and 2-[[[(1*R* or 1*S*)-1-phenylethyl]imino]methyl]phenol (**L2**)<sup>S3</sup> were prepared according to the literature procedure.

## 2. Synthetic Procedures and Characterization

### Preparation of L1

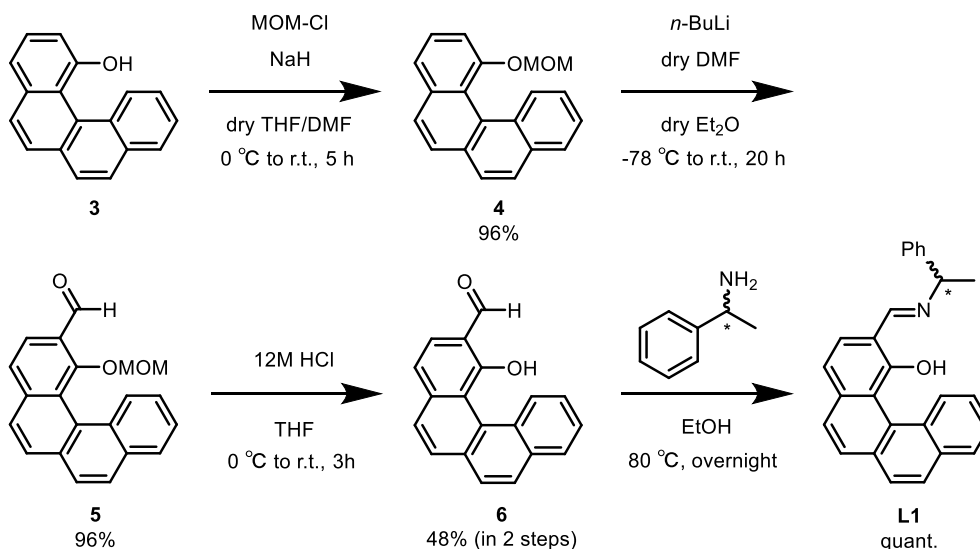

#### 1-(Methoxymethoxy)benzo[*c*]phenanthrene (**4**)

A solution of benzo[*c*]phenanthren-1-ol (**3**)<sup>S1</sup> (186 mg, 0.829 mmol, 1.00 equiv.) in dry THF (5 mL) was added to a suspension of sodium hydride (60% suspension in mineral oil, 39.8 mg, 0.995 mmol, 1.20 equiv.) in dry THF/DMF (5/2 mL) under nitrogen atmosphere at 0 °C. After stirring for 1 h, chloromethyl methyl ether (100 mg, 1.24 mmol, 1.50 equiv.) was added, and the reaction was then stirred for overnight at room temperature. The reaction mixture was quenched with water and then extracted with EtOAc (20 mL x 3). The organic layers were dried over anhydrous MgSO<sub>4</sub>. After the removal of the solvent, the crude product was purified by column chromatography (SiO<sub>2</sub>, *n*-hexane/EtOAc 100:0 to 4:1) to afford 1-(methoxymethoxy)benzo[*c*]phenanthrene (**4**) as a brown solid (183 mg, 77% yield).

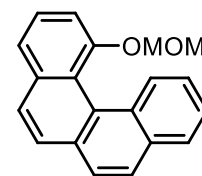

m.p. 168 °C (decomp); IR (KBr): 1157 cm<sup>-1</sup> (C-O); <sup>1</sup>H NMR (CDCl<sub>3</sub>, 500 MHz)  $\delta$  = 8.32 (d, *J* = 8.2 Hz, 1H), 7.97–7.91 (m, 2H), 7.86–7.79 (m, 2H), 7.77 (d, *J* = 7.80 Hz, 1H), 7.70 (dd, *J* = 7.78, 1.07 Hz, 1H), 7.60 (t, *J* = 7.93 Hz, 1H), 7.57–7.46 (m, 3H), 4.93 (s, 2H), 3.37 ppm (s, 3H); <sup>13</sup>C NMR (CDCl<sub>3</sub>, 125 MHz)  $\delta$  = 155.0, 135.2, 132.4, 131.2, 131.3, 130.1, 127.7, 12.72, 126.94, 126.85, 126.7, 125.9, 125.8, 125.5, 123.6, 122.2, 121.0, 112.8, 96.1, 56.6 ppm; HRMS (APCI+): *m/z* [M+H]<sup>+</sup> calcd for C<sub>20</sub>H<sub>17</sub>O<sub>2</sub>: 289.1223; found: 289.1237.

#### 1-Methoxymethoxy[*c*]phenanthrene-2-carbaldehyde (**5**)

*n*-BuLi (in *n*-hexane, *ca.* 1.60 mol/L, 13.1 mL, 20.9 mmol, 3.00 equiv.) was slowly added to a solution of **4** (2.01 g, 6.97 mmol, 1.00 equiv.) in dry Et<sub>2</sub>O (110 mL) at -78 °C under a nitrogen atmosphere. The mixture was stirred for 2 h at room temperature. After cooling to 0 °C, dry DMF (2.16 mL, 27.9 mmol, 4.00 equiv.) was added dropwise. The solution was allowed to warm to room temperature and stirred for overnight. The reaction was quenched with a saturated NH<sub>4</sub>Cl solution and was extracted with EtOAc (40 mL x 3). The organic layers were dried over anhydrous MgSO<sub>4</sub>. After removal of the solvent, the crude 1-(methoxymethoxy)benzo[*c*]phenanthrene-2-carbaldehyde (**5**) was obtained, which used directly in the next step without further purification.

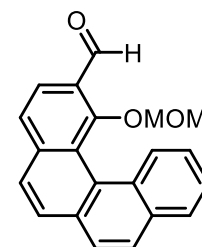

### 1-Hydroxybenzo[*c*]phenanthrene-2-carbaldehyde (**6**)

To a solution of **5** in THF (120 mL) at 0 °C was added to 12 M HCl (30 mL) slowly. The mixture was stirred at room temperature for 3 h. After that, the mixture was poured into water, and was extracted with EtOAc (40 mL x 3), followed by drying over anhydrous MgSO<sub>4</sub>. After the removal of the solvent, the crude product was purified by column chromatography (SiO<sub>2</sub>, *n*-hexane/EtOAc 4:1). Crystallization from CH<sub>2</sub>Cl<sub>2</sub>/*n*-hexane gave 1-hydroxybenzo[*c*]phenanthrene-2-carbaldehyde (**6**) as a yellow solid in 48% yield (0.914 g, overall yield over two reaction steps).

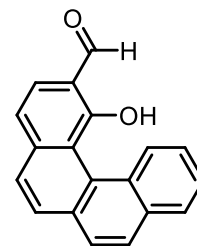

m.p. 165–170 °C; IR (KBr): 3343 cm<sup>-1</sup> (OH), 1743 cm<sup>-1</sup> (C=O); <sup>1</sup>H NMR (CDCl<sub>3</sub>, 500 MHz) δ = 13.05 (s, 1H), 10.09 (s, 1H), 8.36 (dd, *J* = 8.2, 0.6 Hz, 1H), 8.00–7.90 (m, 3H), 7.80 (d, *J* = 6.4 Hz, 1H), 7.79 (d, *J* = 6.1 Hz, 1H), 7.71 (d, *J* = 8.2 Hz, 1H), 7.63–7.53 ppm (m, 3H); <sup>13</sup>C NMR (CDCl<sub>3</sub>, 125 MHz) δ = 196.6, 161.8, 139.4, 133.1, 131.9, 131.5, 131.4, 129.5, 128.8, 128.7, 121.6, 127.3, 126.7, 126.4, 125.6, 124.2, 119.7, 119.5, 115.9 ppm; HRMS (APCI+): *m/z* [M+H]<sup>+</sup> calcd for C<sub>19</sub>H<sub>13</sub>O<sub>2</sub>: 273.0910; found: 273.0929.

### 2-[[[(1*R* or 1*S*)-1-phenylethyl]imino]methyl]benzo[*c*]phenanthren-1-ol (**L1**)

A mixture of (*R*) or (*S*)-1-phenylethylamine (43.8 mg, 0.361 mmol, 1.20 equiv.) and **6** (82.0 mg, 0.301 mmol, 1.00 equiv.) in EtOH (10 mL) was refluxed for overnight. Crystallization from EtOH gave 2-[[[(1*R* or 1*S*)-1-phenylethyl]imino]methyl]benzo[*c*]phenanthren-1-ol (**L1**) as an orange solid (113 mg, quant.).

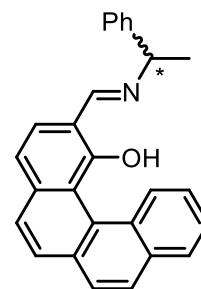

m.p. 80–99 °C; IR (KBr): 3390 cm<sup>-1</sup> (OH), 1612 cm<sup>-1</sup> (C=N); <sup>1</sup>H NMR (CDCl<sub>3</sub>, 500 MHz) δ = 14.84 (br s, 1H), 8.49 (d, *J* = 8.5 Hz, 1H), 8.27 (d, *J* = 5.8 Hz, 1H), 7.91 (dd, *J* = 7.9, 1.2 Hz, 1H), 7.89 (d, *J* = 8.5 Hz, 1H), 7.82 (d, *J* = 8.5 Hz, 1H), 7.76 (d, *J* = 8.5 Hz, 1H), 7.69 (d, *J* = 8.5 Hz, 1H), 7.56 (ddd, *J* = 8.0, 6.9, 1.2 Hz, 1H), 7.49 (ddd, *J* = 8.4, 6.9, 1.5 Hz, 1H), 7.40–7.34 (m, 4H), 7.32–7.27 (m, 2H), 7.19 (d, *J* = 8.5 Hz, 1H), 4.73 (q, *J* = 6.7 Hz, 1H), 1.72 ppm (d, *J* = 6.7 Hz, 3H); <sup>13</sup>C NMR (CDCl<sub>3</sub>, 125 MHz) δ = 169.2, 162.0, 142.9, 138.1, 133.0, 131.9, 131.6, 129.9, 129.6, 128.9 (2C), 128.8, 128.5, 127.7, 127.2, 126.8, 126.4, 126.0, 125.8, 123.5, 122.7, 116.5, 112.5, 64.3, 24.2 ppm; HRMS (APCI+): *m/z* [M+H]<sup>+</sup> calcd for C<sub>27</sub>H<sub>22</sub>NO: 376.1696; found: 376.1719 ; (*S*)-**5**: [α]<sub>D</sub><sup>25</sup> = +124 (*c* 0.001, CHCl<sub>3</sub>), (*R*)-**5**: [α]<sub>D</sub><sup>25</sup> = -122 (*c* 0.001, CHCl<sub>3</sub>).

### Di- $\mu$ -chlorobis[2-(1-isoquinolinyl- $\kappa$ N)phenyl- $\kappa$ C]diplatinum ([Pt(piq)( $\mu$ -Cl)]<sub>2</sub>)<sup>S2</sup>

A mixture of K<sub>2</sub>PtCl<sub>4</sub> (500 mg, 1.00 mmol, 1.00 equiv.) and 1-phenylisoquinoline (246 mg, 1.20 mmol, 1.20 equiv.) in 2-ethoxyethanol/H<sub>2</sub>O (15/5 mL) was warmed at 80 °C for 16 h. After cooling down to room temperature, the mixture was precipitated after the addition of H<sub>2</sub>O (30 mL), filtered, and washed with H<sub>2</sub>O (20 mL) and EtOH (20 mL). After drying under reduced pressure, di- $\mu$ -chlorobis[2-(1-isoquinolinyl- $\kappa$ N)phenyl- $\kappa$ C]diplatinum ([Pt(piq)( $\mu$ -Cl)]<sub>2</sub>) was obtained as a dark green solid (391 mg, 45% yield).

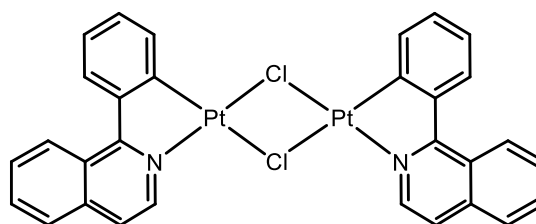

## General procedure for platinum complexes

A solution of corresponding chiral ligands **L1** or **L2** (2.00 equiv.),  $[\text{Pt}(\text{piq})(\mu\text{-Cl})_2]$  (1.00 equiv.), potassium *tert*-butoxide (2.50 equiv.) in dry toluene/DMSO (8/2 mL) was warmed at 80 °C for overnight. After that, the mixture was poured into water, and was extracted with EtOAc (20 mL x 3), followed by drying over anhydrous  $\text{MgSO}_4$ . After the removal of the solvent, the residue was separated by column chromatography ( $\text{SiO}_2$ , eluent;  $\text{CH}_2\text{Cl}_2$ ). The purification by gel permeation chromatography using a recycling preparative HPLC system (eluent as  $\text{CHCl}_3$ ) gave (*S*)-**1** (34%), (*R*)-**1** (36%), (*S*)-**2** (32%) and (*R*)-**2** (29%) as red solids.

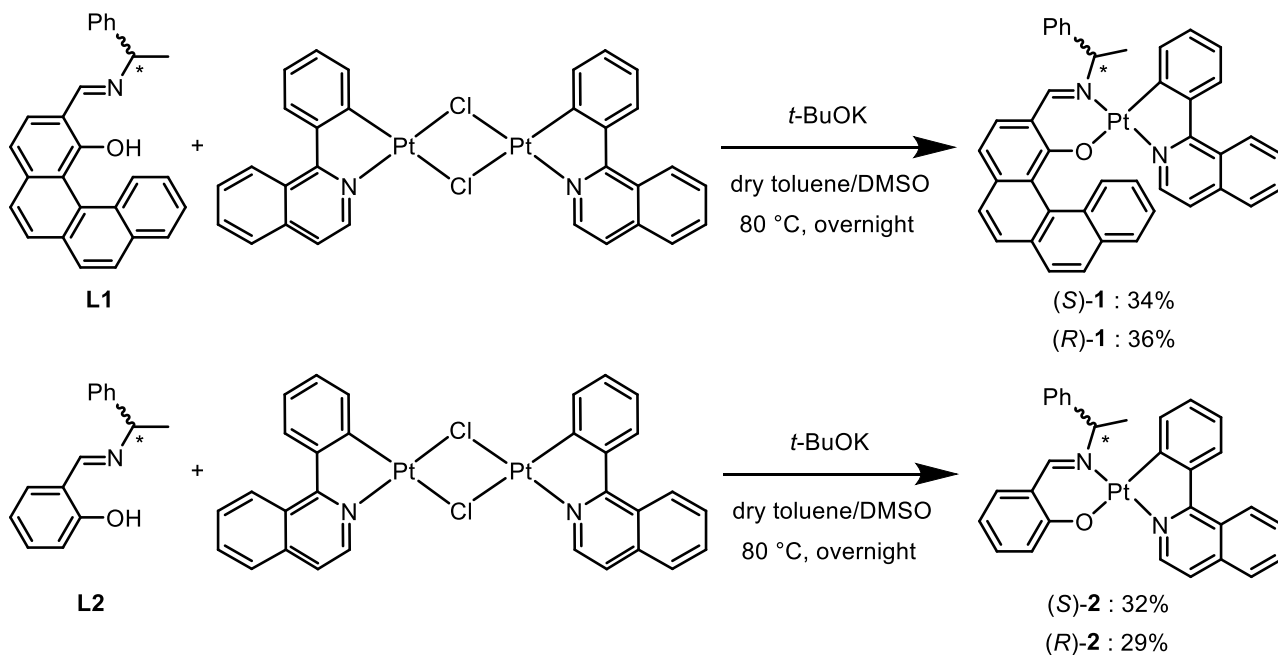

(*S*)/(*R*)-**1**: m.p. 244–248 °C; IR (KBr): 1604  $\text{cm}^{-1}$  (C=N);  $^1\text{H}$  NMR ( $\text{CDCl}_3$ , 500 MHz)  $\delta$  = 8.75 (d,  $J$  = 9.7 Hz, 1H, (*S,M*)), 8.73 (d,  $J$  = 9.5 Hz, 1H, (*S,P*)), 8.45 (d,  $J$  = 8.2 Hz, 1H, (*S,M*)), 8.40 (d,  $J$  = 8.5 Hz, 1H, (*S,P*)), 8.40 (s, 1H, (*S,P*)), 8.20 (s, 1H, (*S,M*)), 8.04–7.83 (m, 10H, (*S,P*) and (*S,M*)), 7.75–7.53 (m, 14H, (*S,P*) and (*S,M*)), 7.49–7.26 (m, 12H, (*S,P*) and (*S,M*)), 7.25–7.06 (m, 8H, (*S,P*) and (*S,M*)), 6.54 (d,  $J$  = 6.4 Hz, 2H, (*S,P*) and (*S,M*)), 6.43 (q,  $J$  = 6.8 Hz, 1H, (*S,P*)), 6.37 (q,  $J$  = 6.9 Hz, 1H, (*S,M*)), 2.08 (d,  $J$  = 6.9 Hz, 3H, (*S,M*)), 2.07 ppm (d,  $J$  = 6.8 Hz, 1H, (*S,P*));  $^{13}\text{C}$  NMR ( $\text{CDCl}_3$ , 125 MHz)  $\delta$  = 167.9, 167.8, 164.1, 163.9, 160.6, 159.9, 148.1, 148.0, 144.6, 143.4, 142.71, 142.69, 142.68, 138.39, 138.37, 138.34, 138.33, 137.2, 134.8, 134.61, 134.59, 132.61, 132.56, 132.53, 132.48, 131.6, 131.5, 130.89, 130.86, 130.6, 129.81, 129.75, 129.70, 129.6, 129.54, 129.52, 129.3, 129.2, 129.00, 128.96, 128.9, 128.7, 127.81, 127.59, 127.55, 127.31, 127.26, 127.23, 127.18, 126.92, 126.90, 126.81, 126.75, 126.6, 126.5, 126.04, 126.02, 126.00, 125.97, 125.10, 125.05, 124.20, 124.16, 124.1, 124.03, 124.00, 122.61, 122.49, 118.14, 118.09, 118.06, 118.0, 115.0, 114.68, 114.65, 114.5, 68.5, 68.4, 24.1, 22.3 ppm; HRMS (APCI+):  $m/z$   $[\text{M}+\text{H}]^+$  calcd for  $\text{C}_{42}\text{H}_{31}\text{N}_2\text{OPt}$ : 774.2082; found: 774.2060; (*S*)-**1**:  $[\alpha]_{\text{D}}^{25} = -32$  (c 0.001,  $\text{CHCl}_3$ ), (*R*)-**1**:  $[\alpha]_{\text{D}}^{25} = +31$  (c 0.001,  $\text{CHCl}_3$ ).

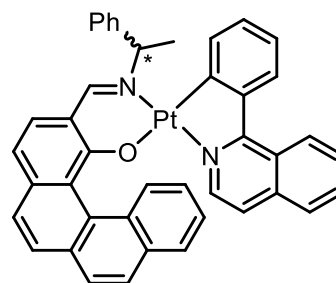

(*S*)/(*R*)-**2**: m.p. 183–185 °C; IR (KBr): 1604 cm<sup>-1</sup> (C=N); <sup>1</sup>H NMR (CDCl<sub>3</sub>, 500 MHz) δ = 9.34 (d, *J* = 6.4 Hz, 1H), 8.84 (d, *J* = 8.9 Hz, 1H), 8.04–7.99 (m, 1H), 7.91 (s, 1H), 7.88 (d, *J* = 8.2 Hz, 1H), 7.79–7.74 (m, 1H), 7.68 (ddd, *J* = 8.5, 6.9, 1.4 Hz, 1H), 7.61 (m, 1H), 7.56–7.51 (m, 3H), 7.42–7.34 (m, 3H), 7.33–7.12 (m, 1H), 7.17–7.12 (m, 2H), 7.10 (dd, *J* = 7.9, 1.8 Hz, 1H), 7.06 (d, *J* = 8.2 Hz, 1H), 6.53–6.48 (m, 1H), 6.32 (q, *J* = 7.0 Hz, 1H), 1.98 ppm (d, *J* = 7.0 Hz, 3H); <sup>13</sup>C

NMR (CDCl<sub>3</sub>, 125 MHz) δ = 166.3, 160.8, 148.0, 143.4, 138.0, 137.7, 134.9, 134.6, 133.7, 131.3, 129.8, 129.6, 128.9, 128.0, 127.7, 127.6, 127.5, 127.46, 127.4, 126.9, 125.4, 122.8, 122.7, 122.2, 118.6, 115.0, 68.7, 23.4 ppm; HRMS (APCI+): *m/z* [M+H]<sup>+</sup> calcd for C<sub>30</sub>H<sub>25</sub>N<sub>2</sub>OPt: 624.1612; found: 624.1598; Anal. calcd for C<sub>30</sub>H<sub>24</sub>N<sub>2</sub>OPt: C, 57.78; H, 3.88; N, 4.49; Found: C, 57.98; H, 3.68; N, 4.53; (*S*)-**2**: [α]<sub>D</sub><sup>25</sup> = -24 (*c* 0.001, CHCl<sub>3</sub>), (*R*)-**2**: [α]<sub>D</sub><sup>25</sup> = +23 (*c* 0.001, CHCl<sub>3</sub>).

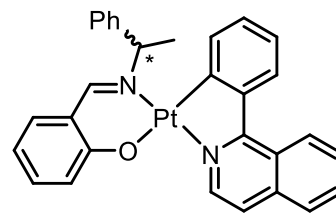

(a)

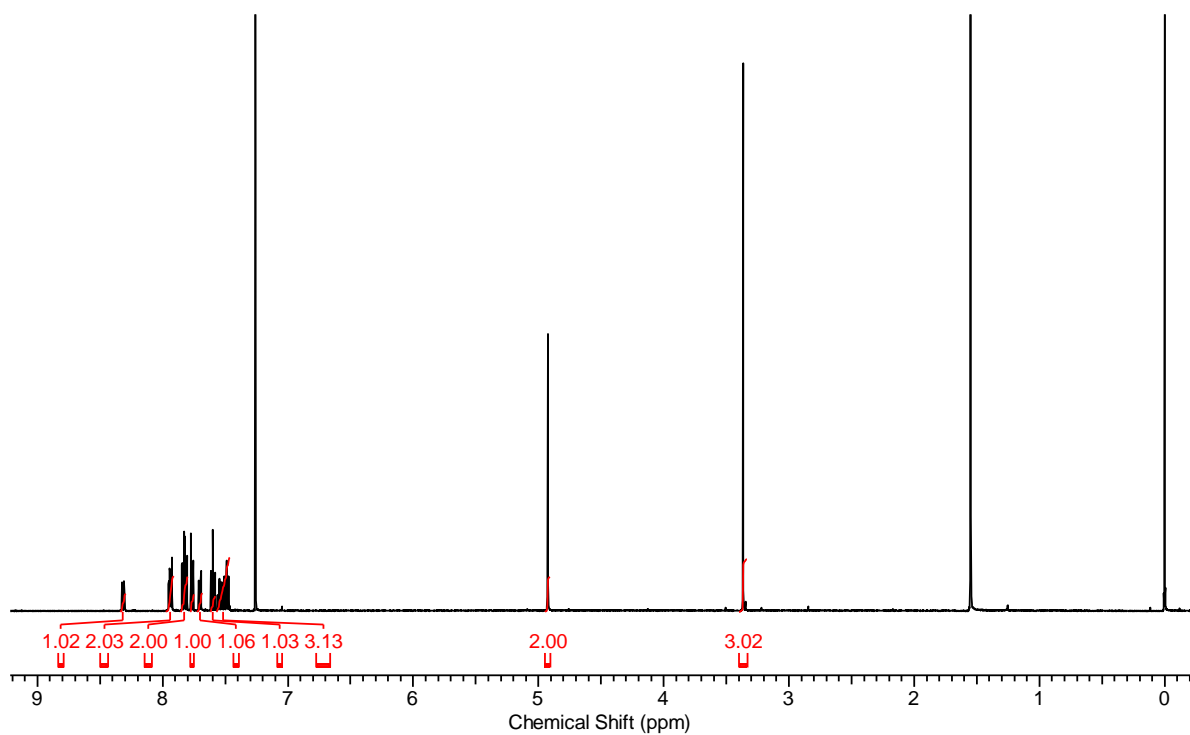

(b)

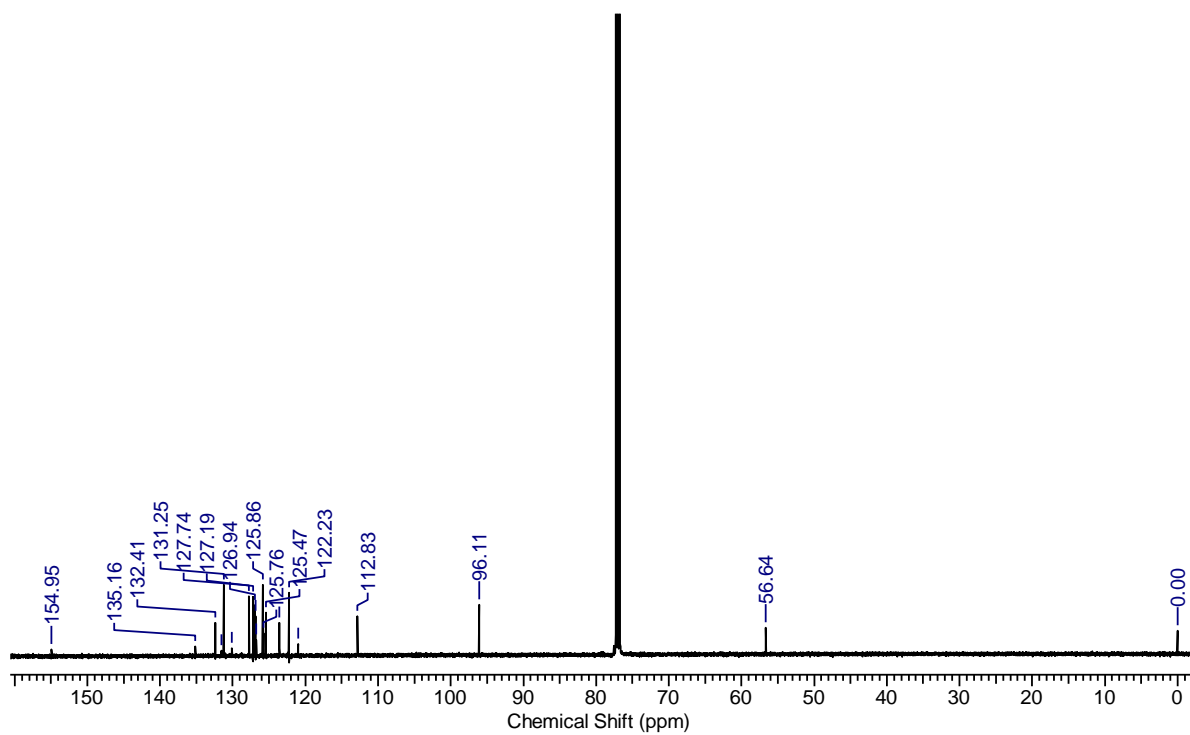

**Fig. S1** (a)  $^1\text{H}$  and (b)  $^{13}\text{C}$  NMR spectra of 1-(methoxymethoxy)benzo[*c*]phenanthrene (**4**) in  $\text{CDCl}_3$ .

(a)

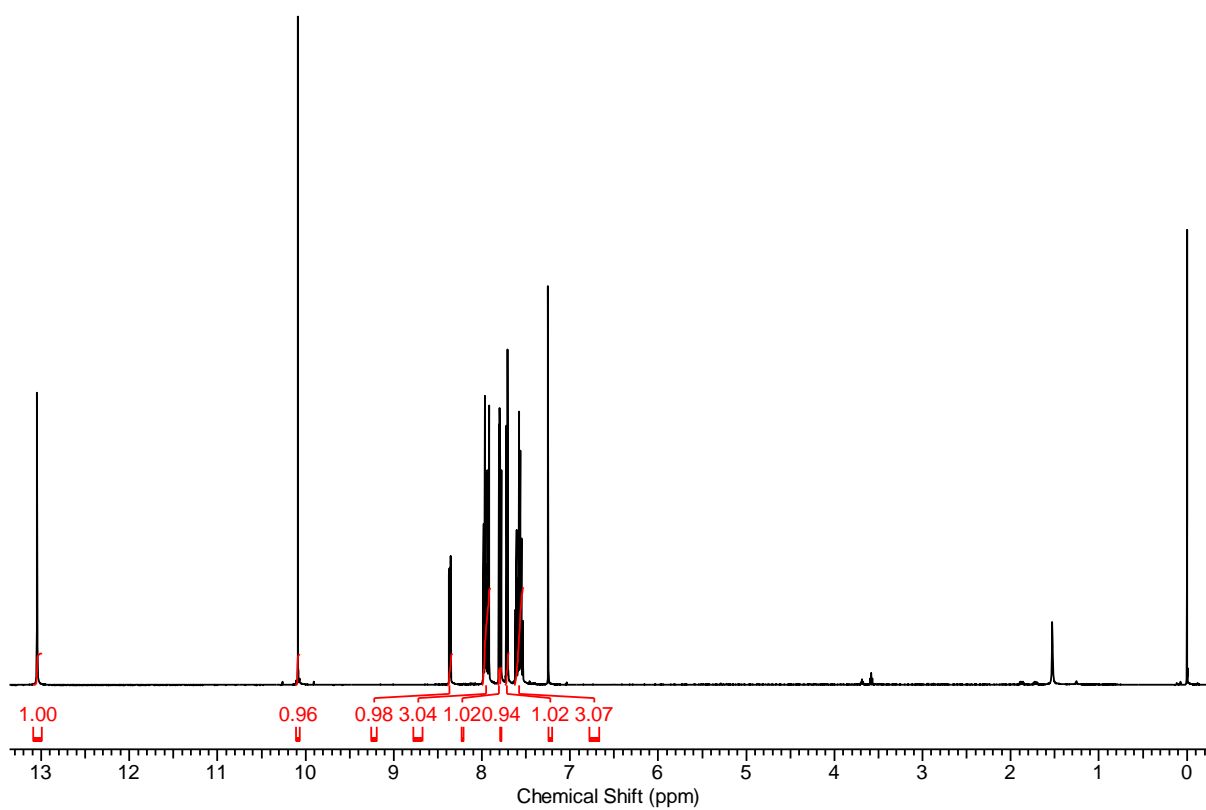

(b)

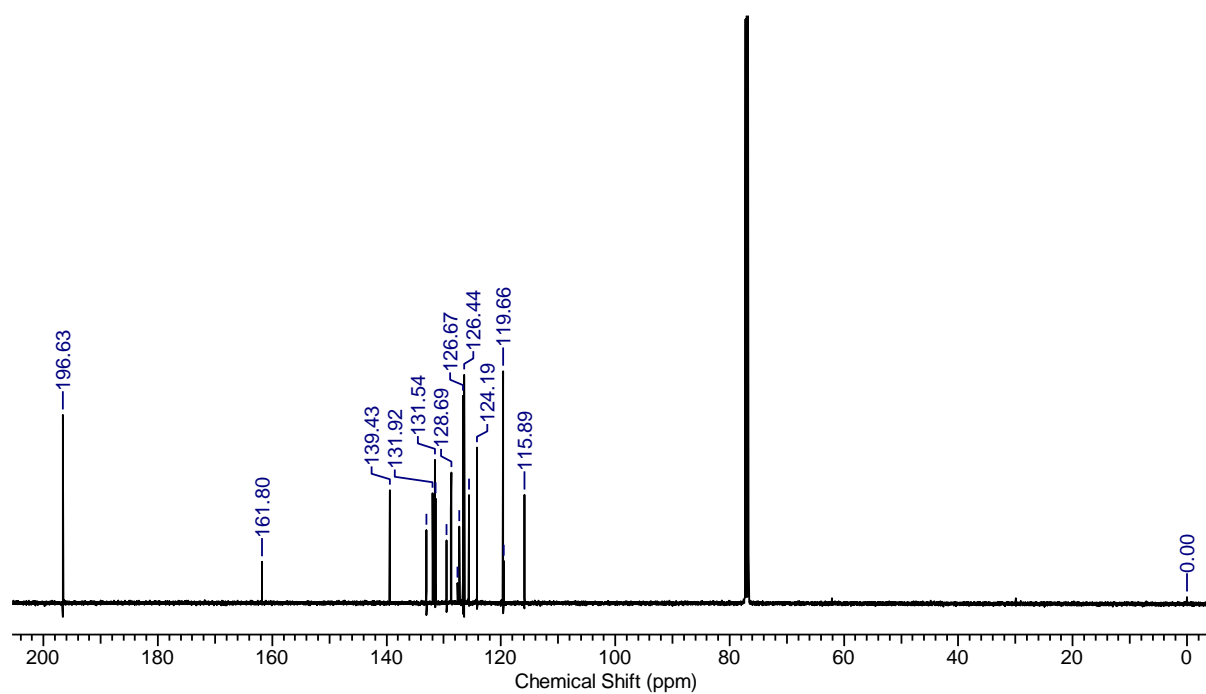

**Fig. S2** (a) <sup>1</sup>H and (b) <sup>13</sup>C NMR spectra of 1-hydroxybenzo[*c*]phenanthrene-2-carbaldehyde (**6**) in CDCl<sub>3</sub>.



(a)

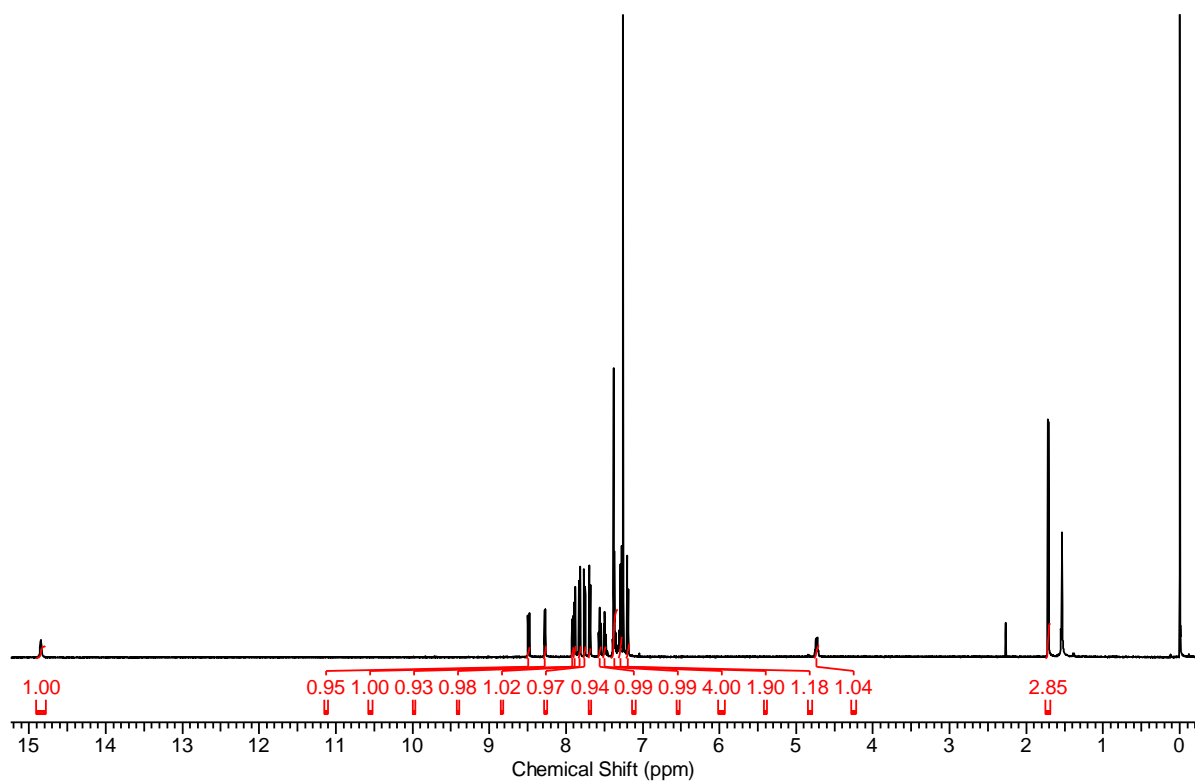

(b)

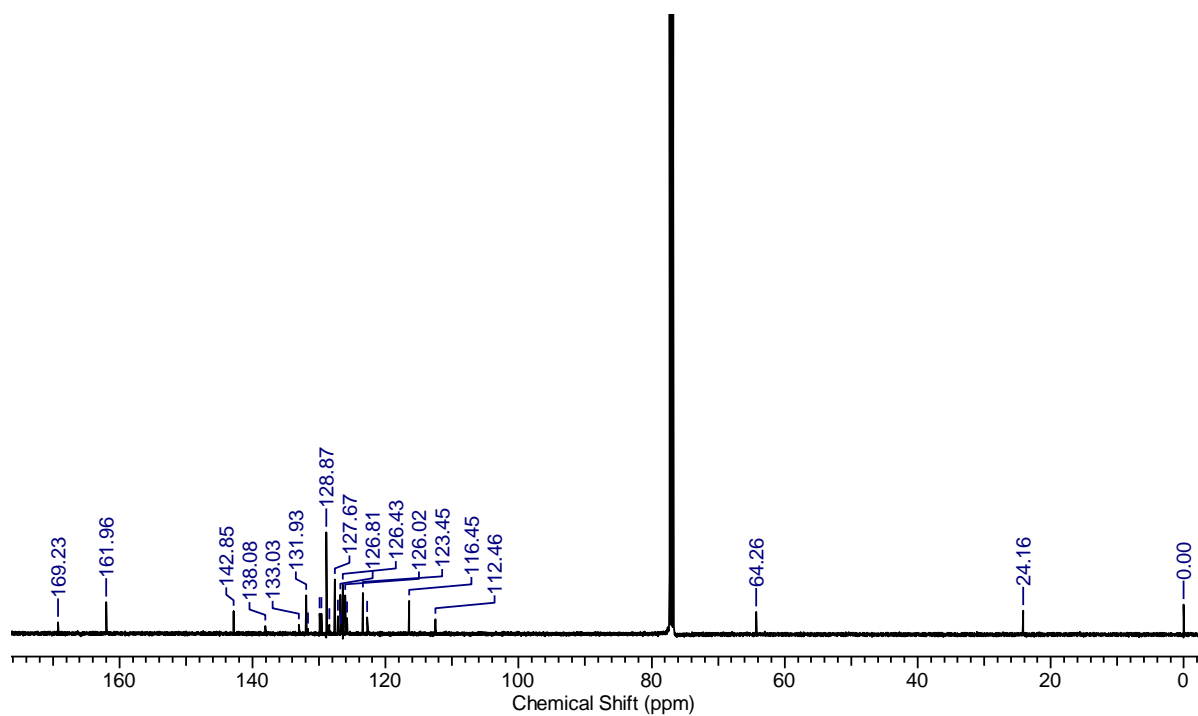

**Fig. S3** (a) <sup>1</sup>H and (b) <sup>13</sup>C NMR spectra of (S)-2-(((1-phenylethyl)imino)methyl)benzo[c]phenanthren-1-ol (**L1**) in CDCl<sub>3</sub>.

(a)

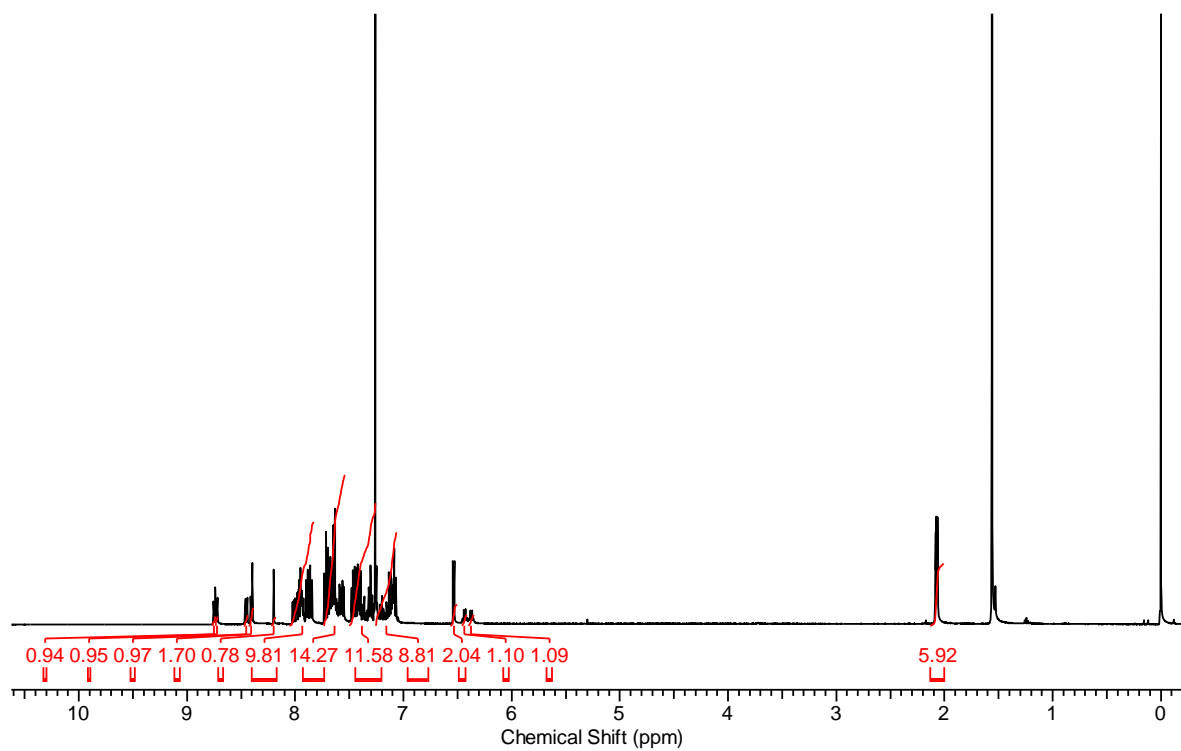

(b)

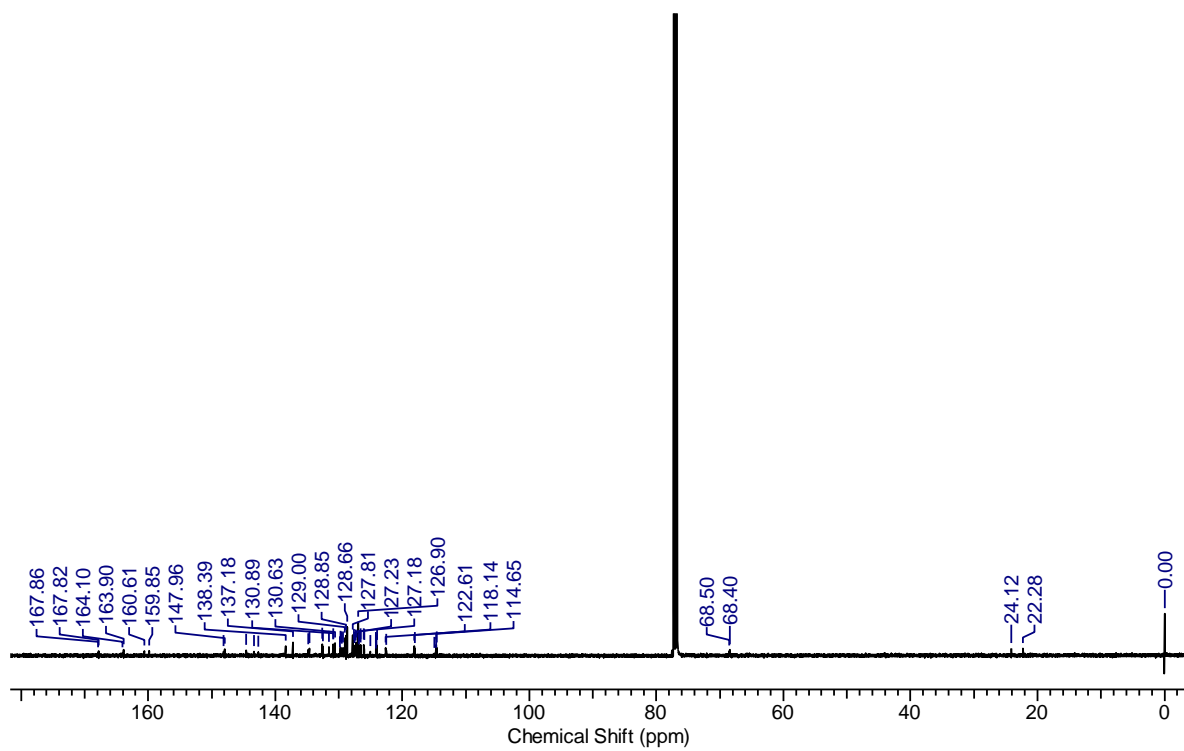

**Fig. S4** (a)  $^1\text{H}$  and (b)  $^{13}\text{C}$  NMR spectra of (*S*)-**1** in  $\text{CDCl}_3$ .

(a)

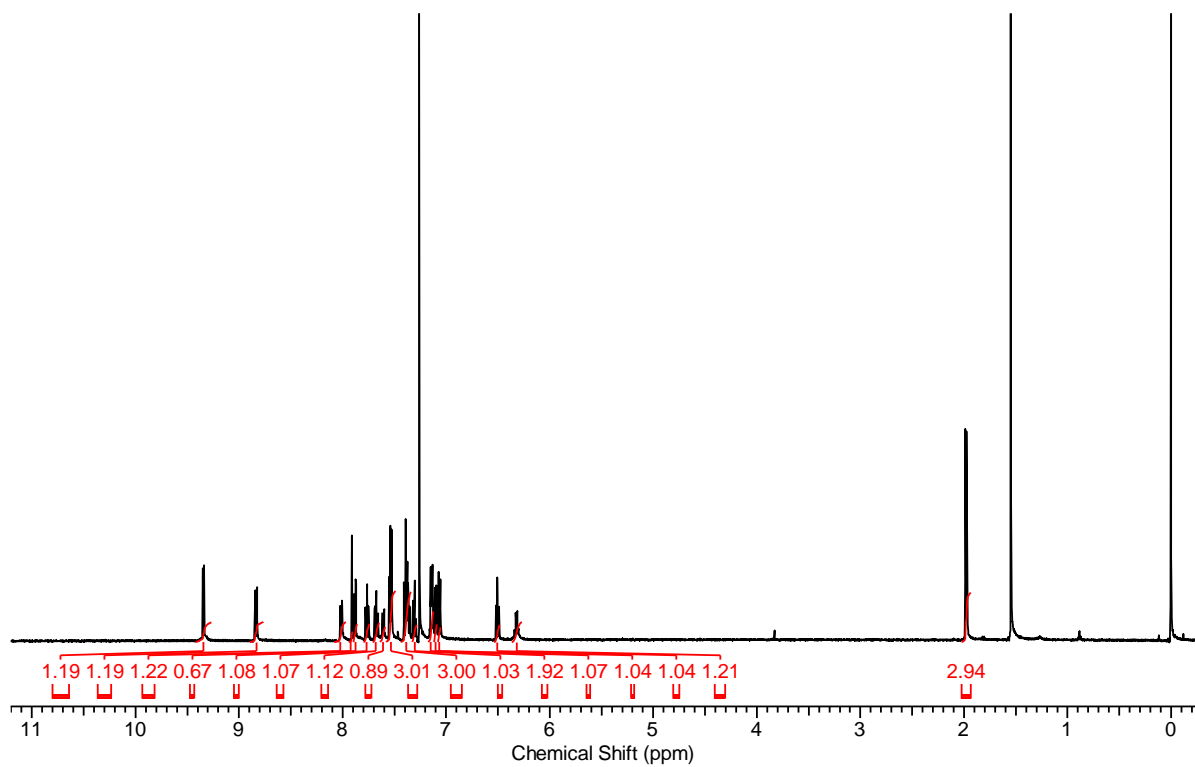

(b)

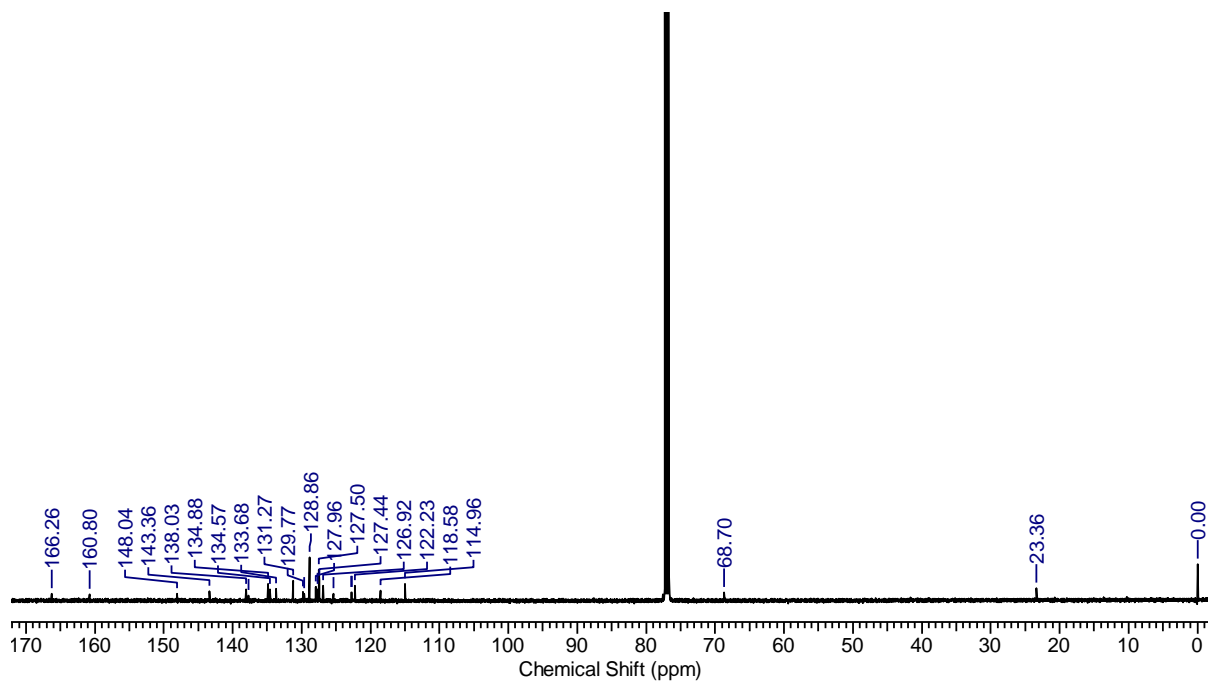

**Fig. S5** (a)  $^1\text{H}$  and (b)  $^{13}\text{C}$  NMR spectra of (*S*)-**2** in  $\text{CDCl}_3$ .

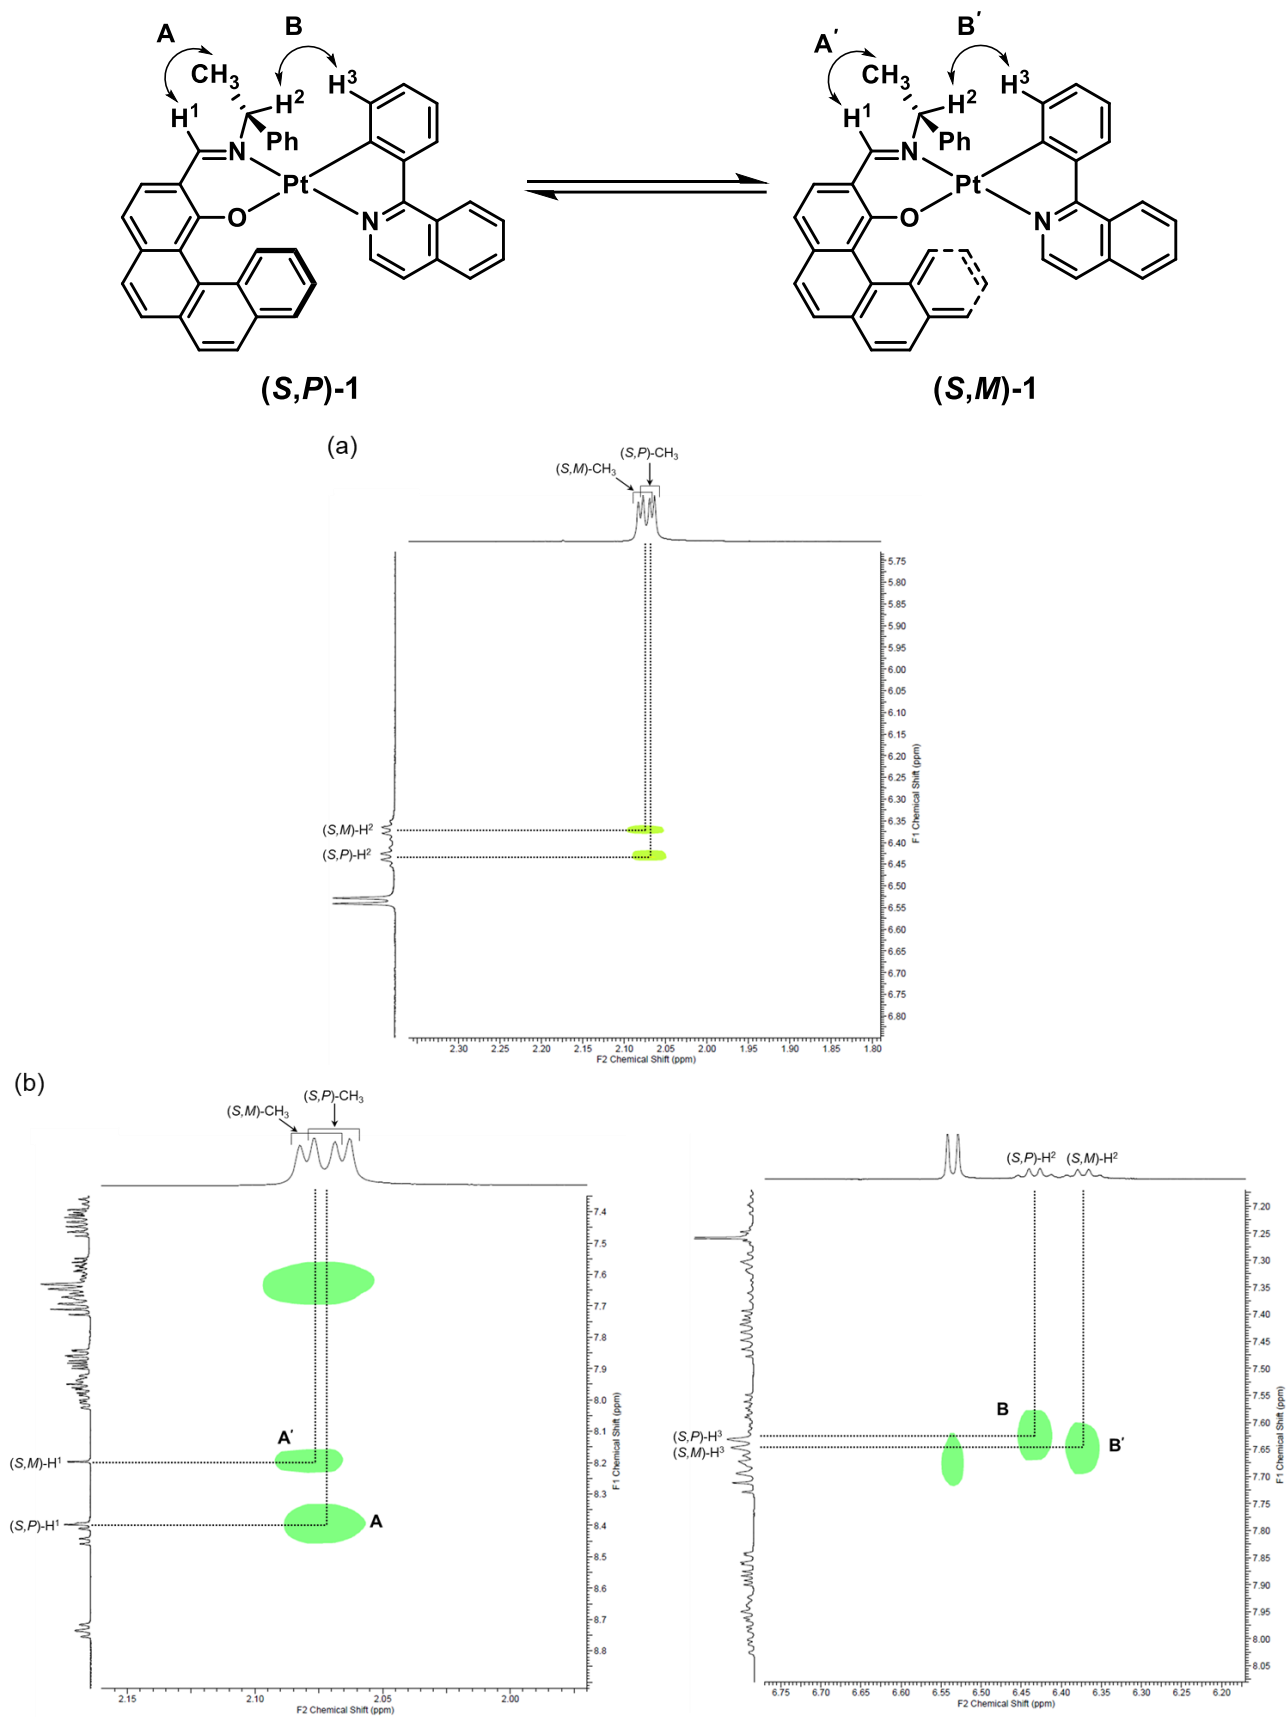

**Fig. S6** (a) gCOSY and (b) NOESY spectra (500 MHz) of (*S*)-**1** in CDCl<sub>3</sub> at 298 K.

### 3. Single Crystal X-ray Diffraction Analysis

Crystals suitable for XRD studies were analyzed using Rigaku XtaLAB mini2 benchtop X-ray crystallography system equipped with a Mo rotating-anode X-ray generator with monochromated Mo- $K_{\alpha}$  radiation ( $\lambda = 0.71073$  Å). The molecular structures and packings in crystals *rac-1*, *rac-2*, were solved by direct methods and refined using the full-matrix least-squares method. In subsequent refinements, the function  $\Sigma\omega(F_o^2 - F_c^2)^2$  was minimized, where  $F_o$  and  $F_c$  are the observed and calculated structure factor amplitudes, respectively. The positions of non-hydrogen atoms were found from differences in Fourier maps of electron density and refined anisotropically. All calculations were performed using the Crystal Structure crystallographic or CrysAlisPro program software package, and illustrations were drawn by using ORTEP.

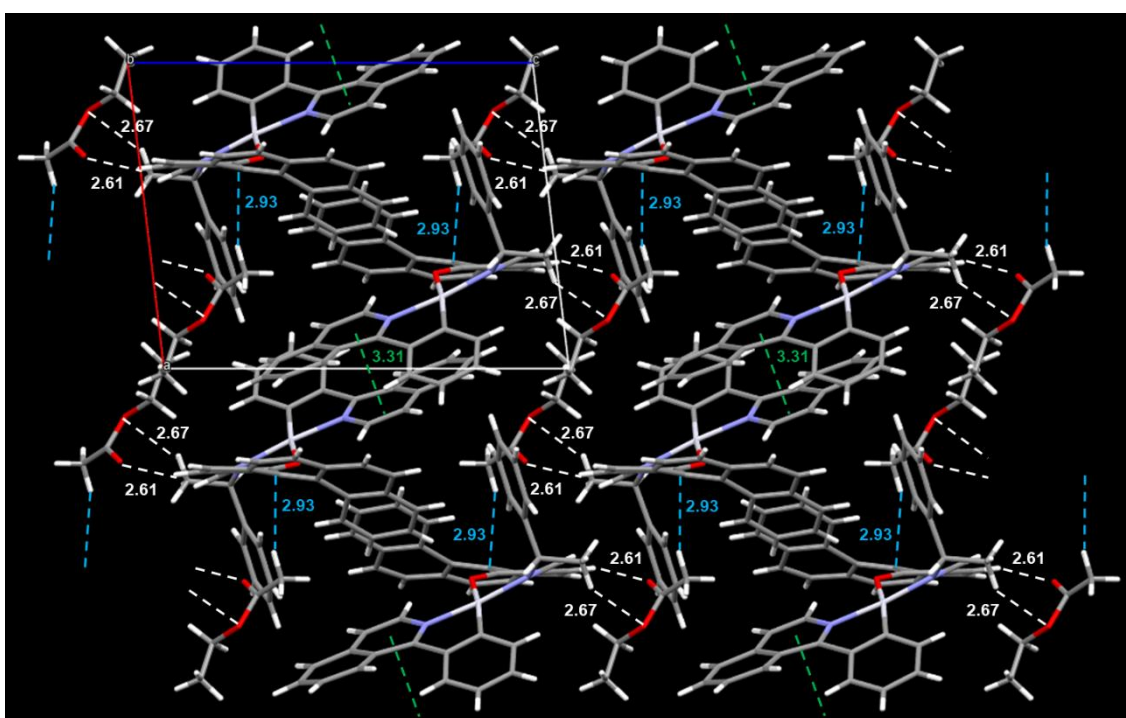

**Fig. S7** Packing structure of *rac-1*. The *b*-axis projection showing CH- $\pi$  (blue broken lines),  $\pi$ - $\pi$  (green broken lines), and H $\cdots$ O (white broken lines) interactions.

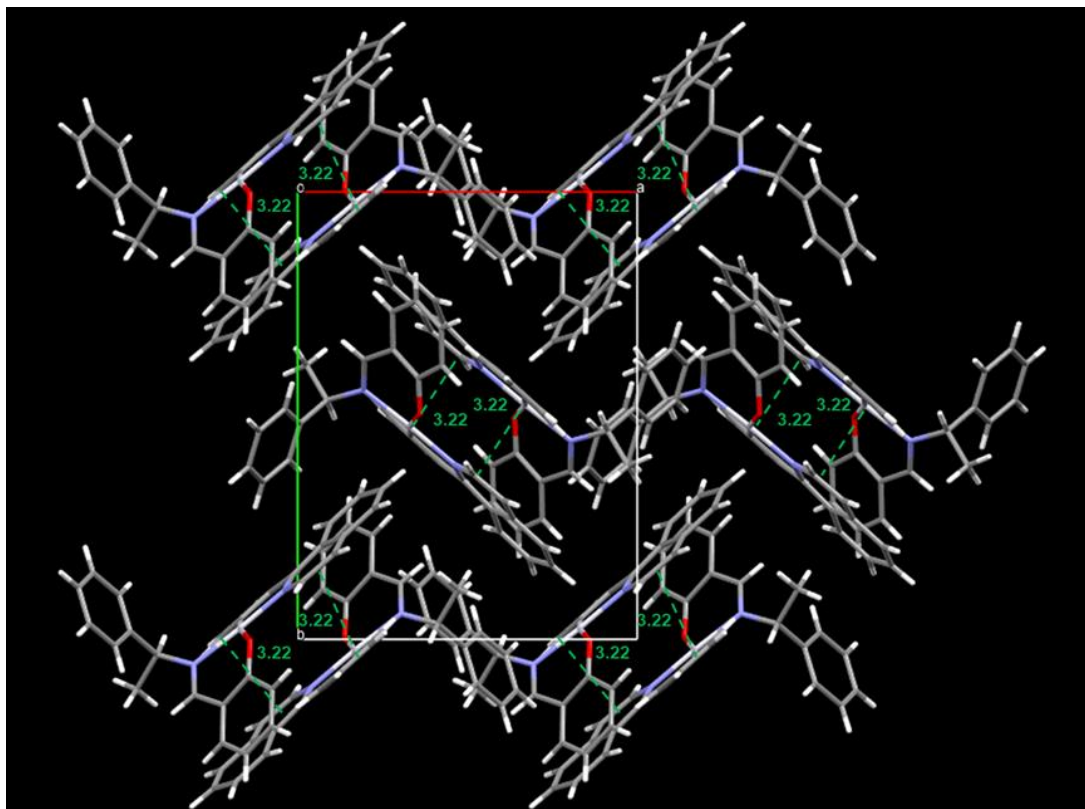

**Fig. S8** Packing structure of *rac-2*. The *c*-axis projection showing  $\pi$ - $\pi$  (green broken lines) interactions.

**Table S1.** Crystal data and structural refinement details for complexes *rac-1* and *rac-2*.

|                                                                   | <i>rac-1</i>                                                             | <i>rac-2</i>                                       |
|-------------------------------------------------------------------|--------------------------------------------------------------------------|----------------------------------------------------|
| Formula                                                           | C <sub>42</sub> H <sub>30</sub> N <sub>2</sub> OPt·CH <sub>3</sub> COOEt | C <sub>30</sub> H <sub>24</sub> N <sub>2</sub> OPt |
| <i>M</i> <sub>F</sub>                                             | 861.87                                                                   | 623.60                                             |
| <i>T</i> [K]                                                      | 113.15                                                                   | 113.15                                             |
| Crystal color, habit                                              | reddish colorless, block                                                 | reddish colorless, block                           |
| Crystal size [mm]                                                 | 0.258×0.24×0.146                                                         | 0.418×0.299×0.194                                  |
| Crystal system                                                    | Triclinic                                                                | Monoclinic                                         |
| Space group                                                       | <i>P</i> $\bar{1}$ (#2)                                                  | <i>P</i> 2 <sub>1</sub> / <i>n</i> (#14)           |
| <i>a</i> [Å]                                                      | 10.8643(3)                                                               | 11.8288(4)                                         |
| <i>b</i> [Å]                                                      | 11.6179(5)                                                               | 15.4199(5)                                         |
| <i>c</i> [Å]                                                      | 14.5758(8)                                                               | 12.4090(4)                                         |
| $\alpha$ [°]                                                      | 77.263(4)                                                                | 90                                                 |
| $\beta$ [°]                                                       | 82.321(3)                                                                | 98.051(3)                                          |
| $\gamma$ [°]                                                      | 84.958(3)                                                                | 90                                                 |
| <i>V</i> [Å <sup>3</sup> ]                                        | 1775.15(13)                                                              | 2241.08(13)                                        |
| <i>Z</i>                                                          | 2                                                                        | 4                                                  |
| <i>D</i> <sub>calcd</sub> [g cm <sup>-3</sup> ]                   | 1.612                                                                    | 1.848                                              |
| Abs coeff (mm <sup>-1</sup> )                                     | 3.998                                                                    | 6.288                                              |
| Abs correct                                                       | multi-scan                                                               | multi-scan                                         |
| Transmiss max/min                                                 | 1.0000/0.81892                                                           | 1.0000/0.38036                                     |
| <i>F</i> (000)                                                    | 860                                                                      | 1216                                               |
| $\theta$ range (°)                                                | 1.9500–26.9850                                                           | 2.1400–29.7320                                     |
| RfIns/unique                                                      | 36661/10206                                                              | 24394/6539                                         |
| <i>R</i> <sub>int</sub>                                           | 0.0844                                                                   | 0.0315                                             |
| Data/params                                                       | 10206/54/472                                                             | 6539/0/308                                         |
| Largest diff. peak and hole (e Å <sup>-3</sup> )                  | 8.129/–4.204                                                             | 2.833/–1.290                                       |
| <i>R</i> <sub>1</sub> ( <i>I</i> > 2σ( <i>I</i> )) <sup>[a]</sup> | 0.0722                                                                   | 0.0303                                             |
| w <i>R</i> <sub>2</sub> (all reflections) <sup>[b]</sup>          | 0.1933                                                                   | 0.0605                                             |
| Goodness of fit                                                   | 1.080                                                                    | 1.030                                              |
| CCDC No.                                                          | 2321030                                                                  | 2321031                                            |

[a]  $R_1 = \Sigma(|F_o| - |F_c|) / \Sigma(|F_o|)$ . [b]  $wR_2 = [\Sigma(w(F_o^2 - F_c^2)^2) / \Sigma wF_o^2]^{1/2}$ .

#### 4. NMR Analysis

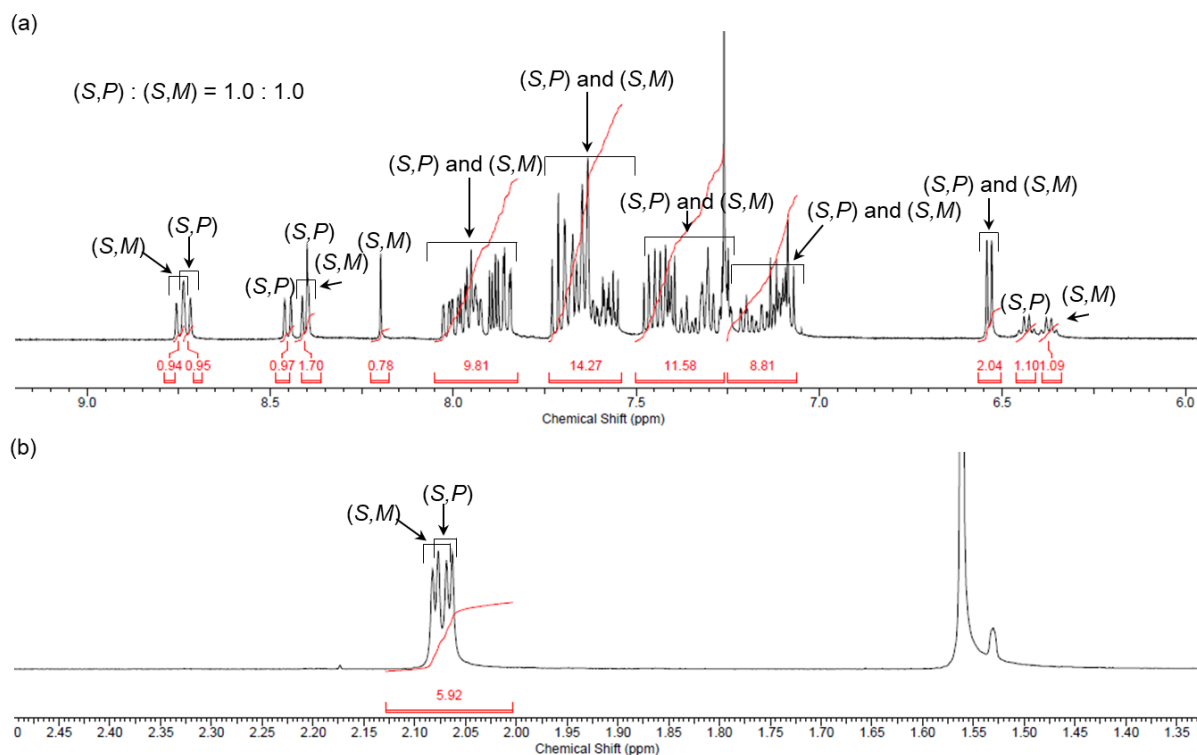

**Fig. S9**  $^1\text{H}$  NMR spectra of (a) aromatic and (b) aliphatic regions of (*S*)-**1** in  $\text{CDCl}_3$  at 298 K.

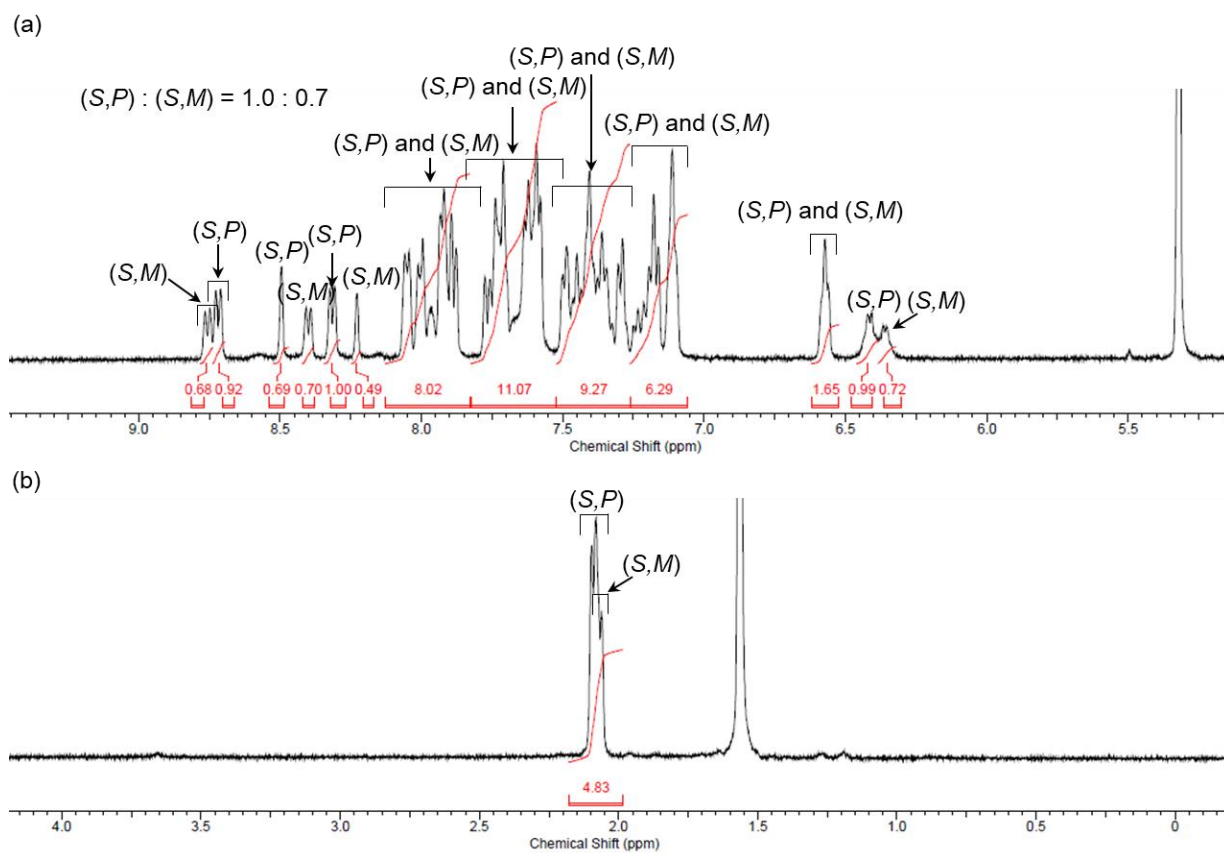

**Fig. S10**  $^1\text{H}$  NMR spectra of (a) aromatic and (b) aliphatic regions of (*S*)-**1** in  $\text{CD}_2\text{Cl}_2$  at 298 K.



(a)

$(S,P) : (S,M) = 1.0 : 0.5$

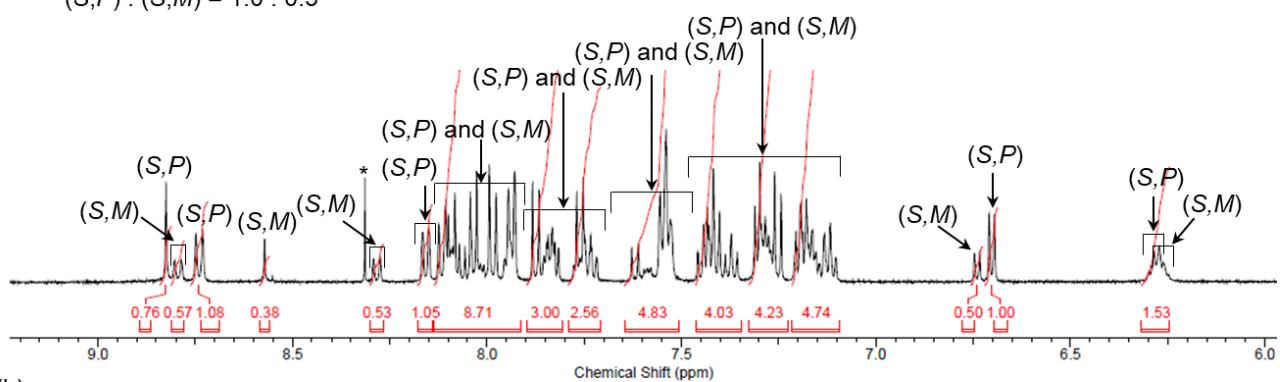

(b)

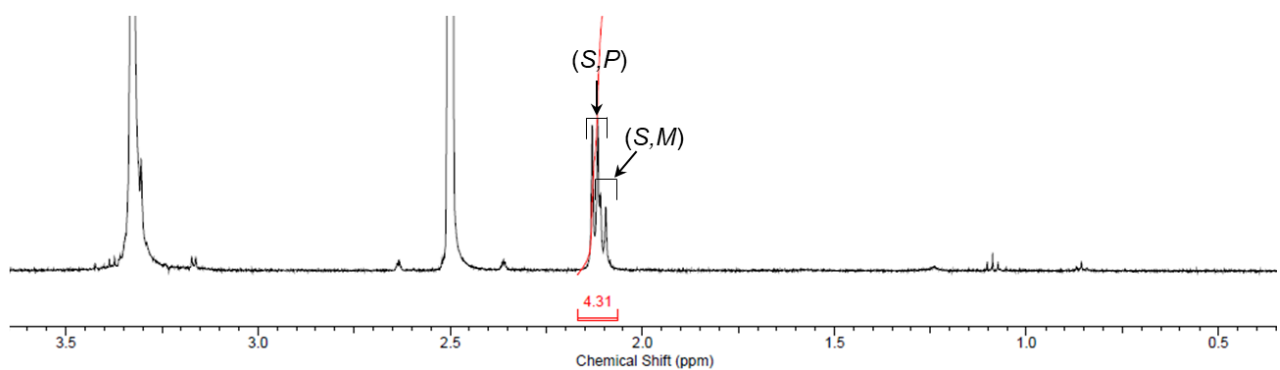

**Fig. S11**  $^1\text{H}$  NMR spectra of (a) aromatic and (b) aliphatic regions of (*S*)-**1** in  $\text{DMSO-}d_6$  at 298 K. Asterisked peaks correspond to the  $\text{CHCl}_3$  signal.

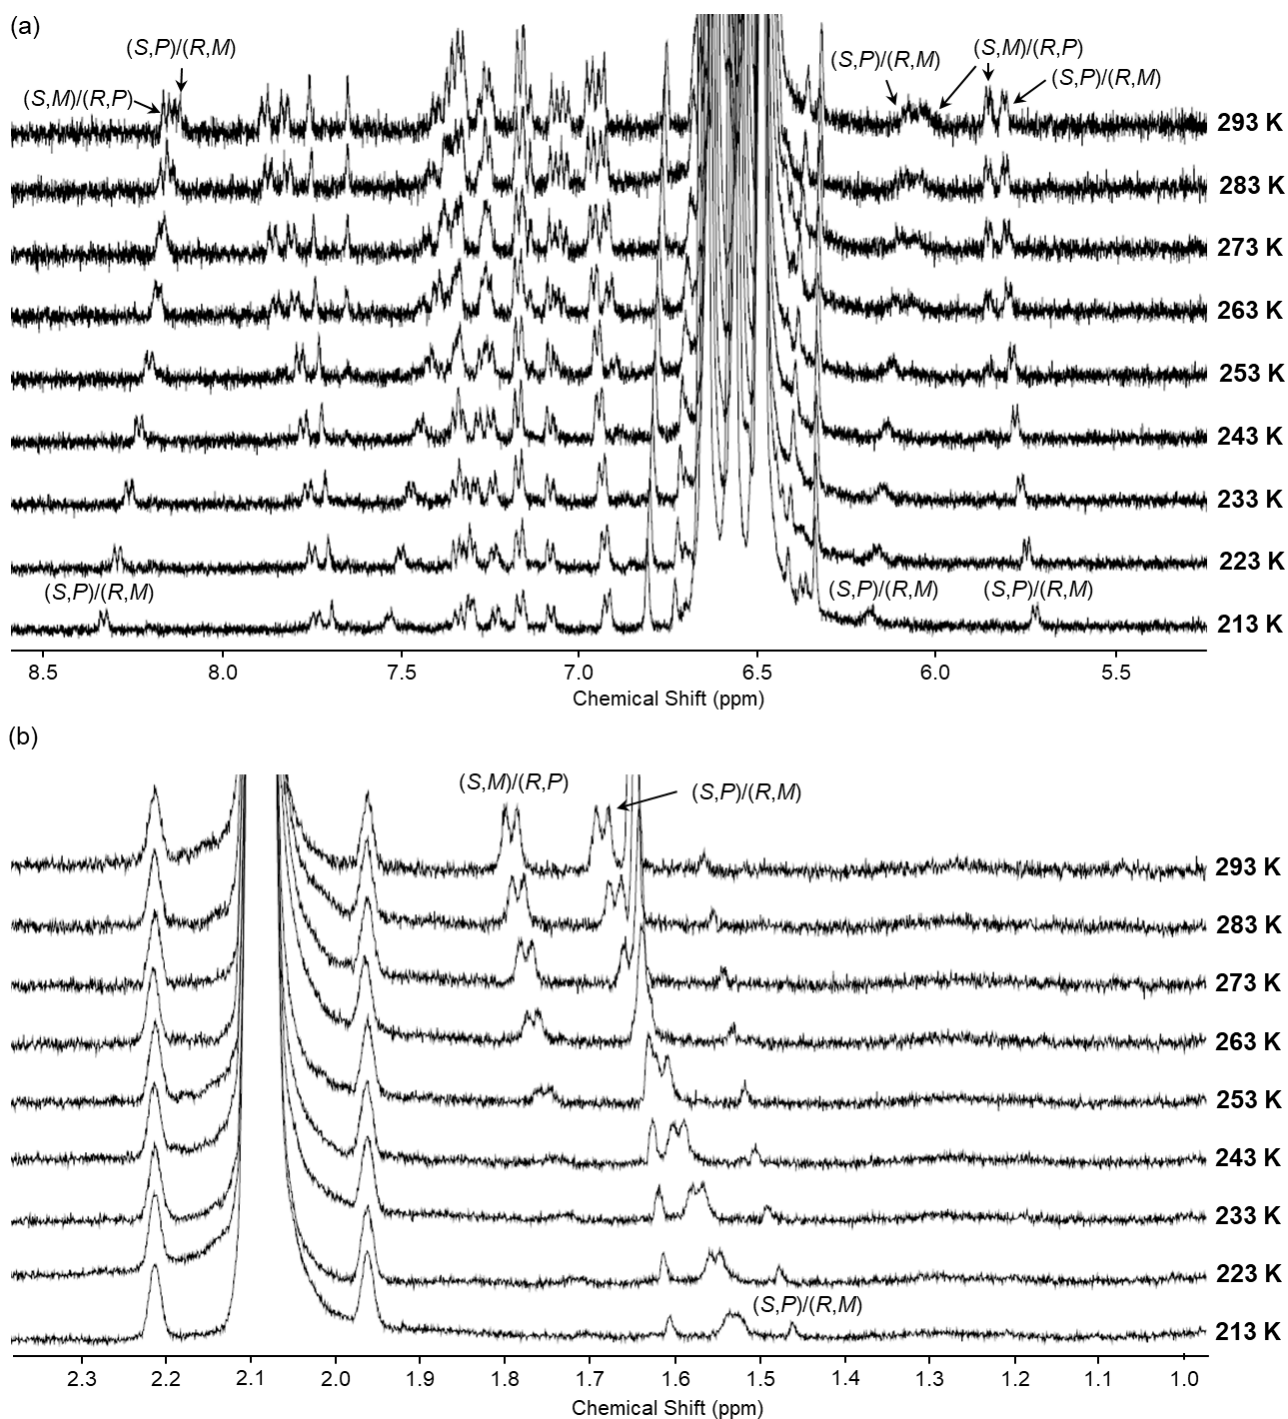

**Fig. S12** VT  $^1\text{H}$  NMR spectra (500 MHz) of (a) aromatic and (b) aliphatic regions of *rac-1* in toluene- $d_8$ . For these measurements, crystals of *rac-1* were dissolved in toluene- $d_8$  at 195 K and  $^1\text{H}$  NMR spectra were recorded from 213 K to 293 K.

## 5. Photophysical Properties

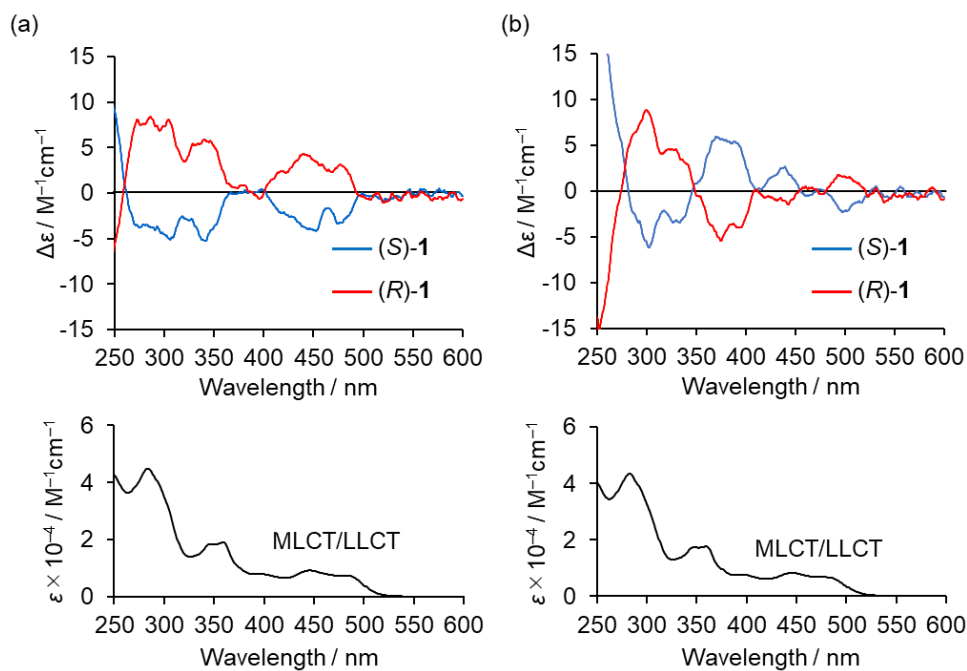

**Fig. S13** CD (upper plot) and UV-vis (lower plot) spectra of **1** in (a) CHCl<sub>3</sub> and (b) DMSO (2.0 × 10<sup>-4</sup> M) at 298 K.

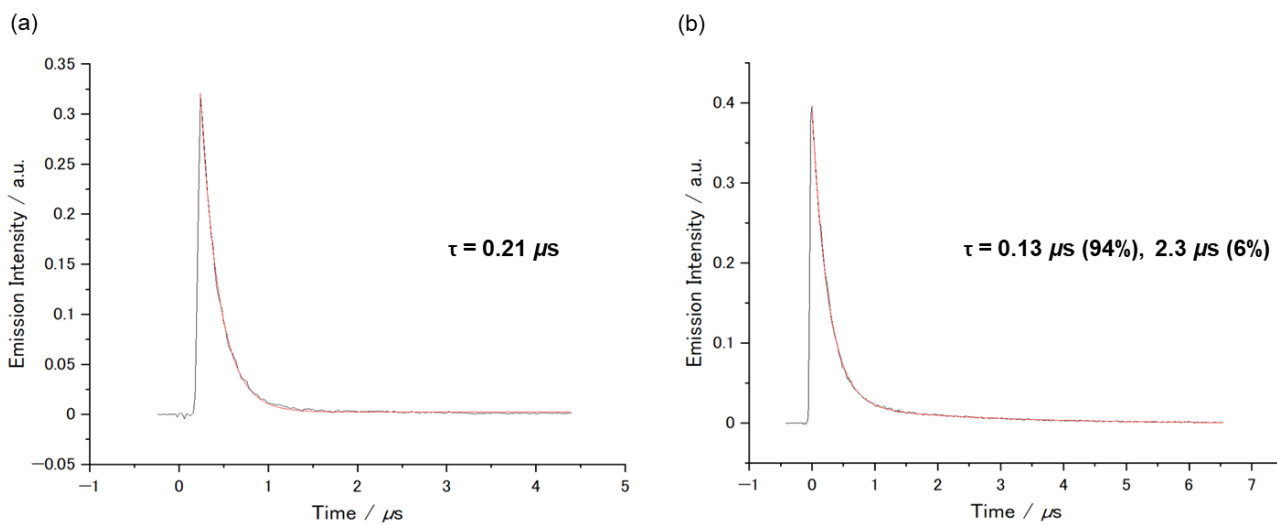

**Fig. S14** Luminescence decay curve of (a) **1** and (b) **2** in CH<sub>2</sub>Cl<sub>2</sub> (2.0 × 10<sup>-4</sup> M) at 298 K.

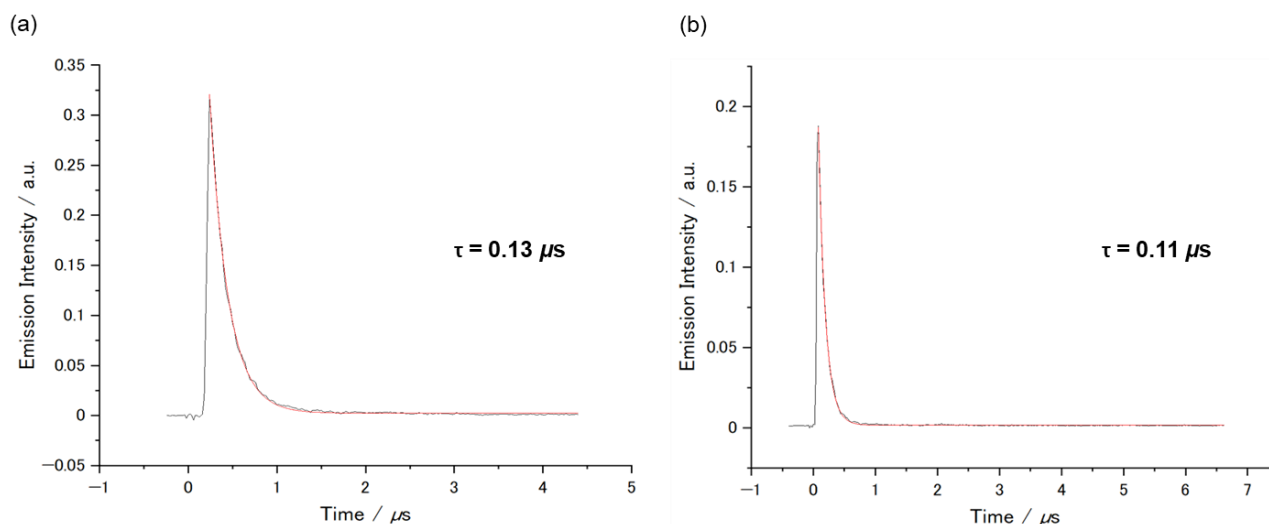

**Fig. S15** Luminescence decay curve of **1** in (a)  $\text{CHCl}_3$  and (a) DMSO ( $2.0 \times 10^{-4}$  M) at 298 K.

**Table S2.** Photophysical data for complexes **1** and **2**.

| Complex  | Medium                                  | $\lambda_{\text{abs}}$ [nm] | $\lambda_{\text{em}}$ [nm] <sup>[b]</sup> | $\Phi$ <sup>[b,c]</sup> | $\tau$ [ $\mu\text{s}$ ] <sup>[b]</sup> | $k_r \times 10^4$ [ $\text{s}^{-1}$ ] <sup>[d]</sup> | $k_{\text{nr}} \times 10^5$ [ $\text{s}^{-1}$ ] <sup>[e]</sup> | $ g_{\text{lum}} $ <sup>[f]</sup> | $B_{\text{CPL}}$ [ $\text{M}^{-1}\text{cm}^{-1}$ ] <sup>[h]</sup> |
|----------|-----------------------------------------|-----------------------------|-------------------------------------------|-------------------------|-----------------------------------------|------------------------------------------------------|----------------------------------------------------------------|-----------------------------------|-------------------------------------------------------------------|
| <b>1</b> | $\text{CH}_2\text{Cl}_2$ <sup>[a]</sup> | 481                         | 608                                       | 0.01                    | 0.21                                    | 4.76                                                 | 47.1                                                           | 0.010                             | 1.1                                                               |
|          | $\text{CHCl}_3$ <sup>[a]</sup>          | 482                         | 604                                       | <0.01                   | 0.13                                    | 4.23                                                 | 76.5                                                           | — <sup>[g]</sup>                  | —                                                                 |
|          | DMSO <sup>[a]</sup>                     | 478                         | 604                                       | 0.01                    | 0.11                                    | 9.09                                                 | 90.0                                                           | — <sup>[g]</sup>                  | —                                                                 |
|          | solid                                   | —                           | 639                                       | 0.02                    | —                                       | —                                                    | —                                                              | — <sup>[g]</sup>                  | —                                                                 |
| <b>2</b> | $\text{CH}_2\text{Cl}_2$ <sup>[a]</sup> | 460                         | 607                                       | 0.02                    | 0.13 (94%)<br>2.3 (6%)                  | 7.69                                                 | 37.7                                                           | 0.003                             | 0.3                                                               |
|          | solid                                   | —                           | 632                                       | 0.06                    | —                                       | —                                                    | —                                                              | — <sup>[g]</sup>                  | —                                                                 |

[a] Data were obtained from  $2.0 \times 10^{-4}$  M solutions at 298 K. [b]  $\lambda_{\text{ex}} = 480$  (**1**), 470 (**2**) nm. [c] Luminescent quantum efficiencies measured using the absolute method with an integrating sphere. [d]  $k_r = \Phi_{298\text{K}}/\tau$ . [e]  $k_{\text{nr}} = (1 - \Phi_{298\text{K}})/\tau$ . [f] The average  $|g_{\text{lum}}|$  values around  $\lambda_{\text{max}}$ . [g] CPP were not detected due to the low phosphorescence intensity. [h]  $B_{\text{CPL}} = \epsilon \times \Phi \times g_{\text{lum}}$ .

## 6. Computational Methods

All calculations were carried out based on DFT with the B3LYP exchange-correlation functional, using the Gaussian 16W program package.<sup>S4</sup> The basis set used was the effective core potential (LanL2DZ) for platinum atoms and 6-31G\* for the remaining atoms. Molecular orbitals and their eigenvalues for (*S,P*)-**1** and (*S*)-**2** were estimated using the optimized geometries determined by the DFT calculations using initial geometries obtained from XRD analysis. An initial structure with opposite configuration at the metal, (*S,M*)-**1**, was obtained by mirror inversion of the optimized structure of (*S,P*)-**1**, followed by manual inversion of the carbon chirality centers only. The singlet–singlet ( $E(S_n)$ ) and singlet–triplet ( $E(T_n)$ ) transition energies were estimated by time-dependent (TD) DFT calculation (B3LYP/6-31G\*, LanL2DZ).

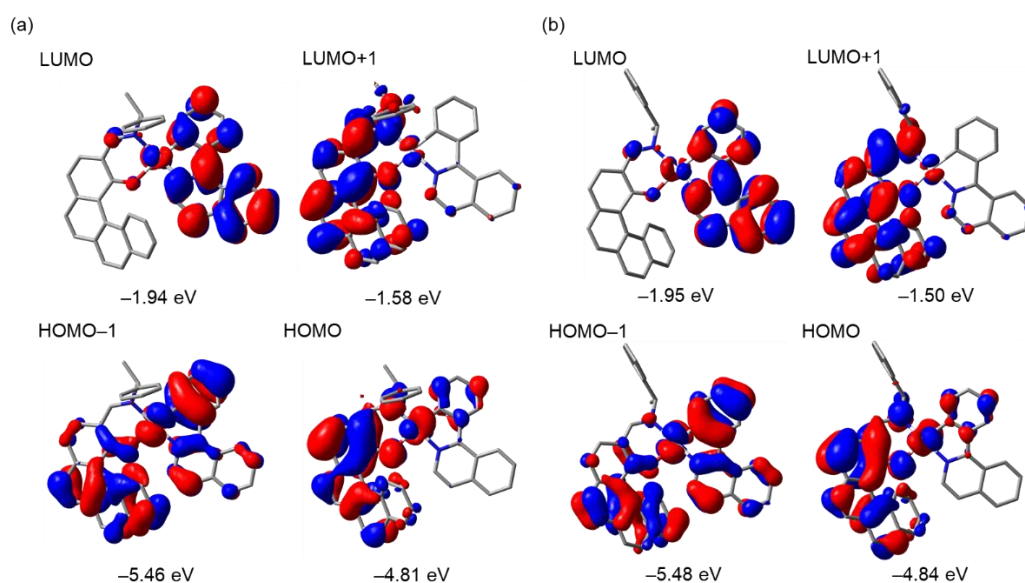

**Fig. S16** Molecular orbitals and eigenvalues for the frontier orbitals of (a) (*S,P*)-**1** and (b) (*S,M*)-**1** estimated from DFT calculations (B3LYP/6-31G\*, LanL2DZ) on the basis of the optimized geometries in the  $S_0$  states.

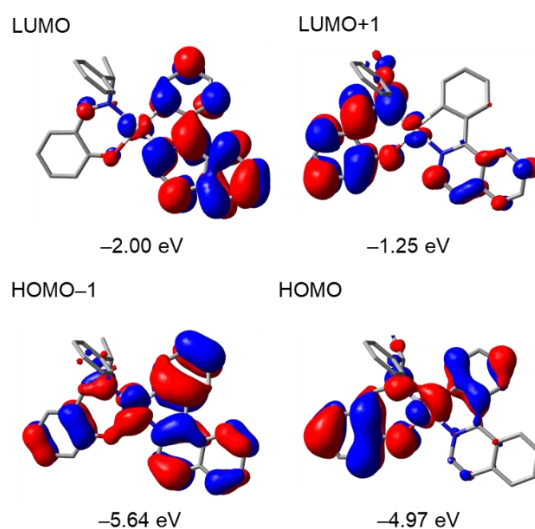

**Fig. S17** Molecular orbitals and eigenvalues for the frontier orbitals of (*S*)-**2** estimated from DFT calculations (B3LYP/6-31G\*, LanL2DZ) on the basis of the optimized geometries in the  $S_0$  states.

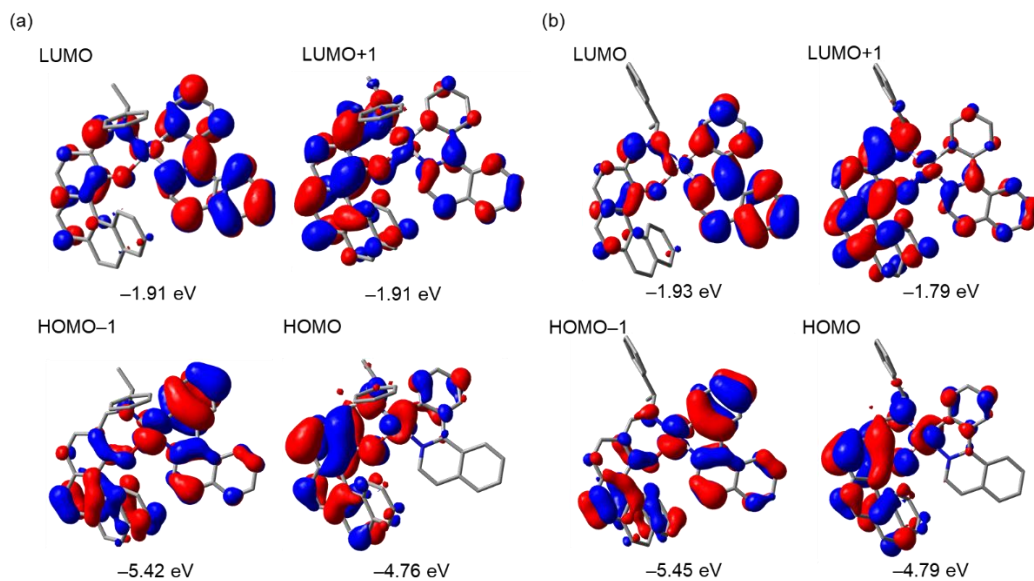

**Fig. S18** Molecular orbitals and eigenvalues for the frontier orbitals of (a) (*S,P*)-1 and (b) (*S,M*)-1 estimated from DFT calculations (B3LYP/6-31G\*, LanL2DZ) on the basis of the optimized geometries in the  $T_1$  states.

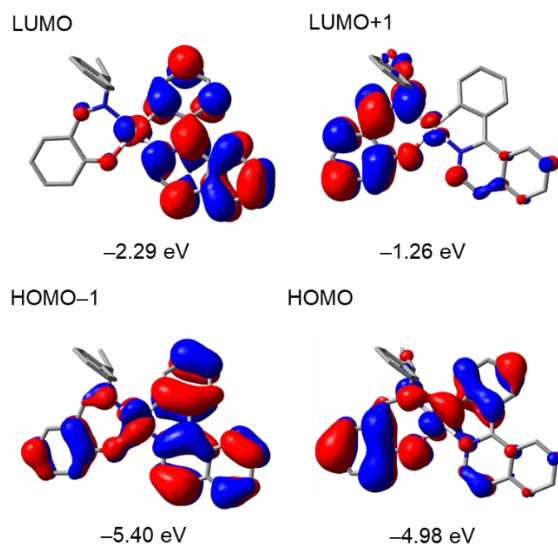

**Fig. S19** Molecular orbitals and eigenvalues for the frontier orbitals of (*S*)-2 estimated from DFT calculations (B3LYP/6-31G\*, LanL2DZ) on the basis of the optimized geometries in the  $T_1$  states.

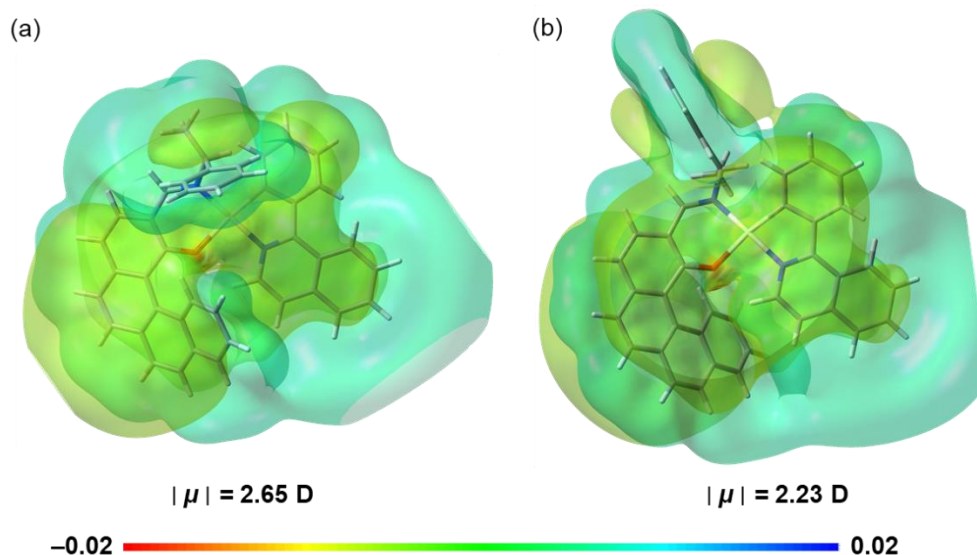

**Fig. S20** Electrostatic potential (ESP) surfaces and dipole moments of (a) (*S,P*)-**1** and (b) (*S,M*)-**1** estimated from DFT calculations (B3LYP/6-31G\*, LanL2DZ) on the basis of the optimized geometries in the  $S_0$  optimized states.

**Table S3.** Selected data for excitation energy, major configuration, coefficient and oscillator strength for **1** and **2** (for the geometries optimized in the  $S_0$  state).<sup>[a]</sup>

| Compound                | State | Excitation energy [eV] | Major configuration <sup>[b]</sup> | Coefficient | Oscillator strength |
|-------------------------|-------|------------------------|------------------------------------|-------------|---------------------|
| <i>(S,P)</i> - <b>1</b> | $S_1$ | 2.40 (518 nm)          | HOMO→LUMO                          | 0.697 (97%) | 0.0554              |
|                         | $S_2$ | 2.77 (448 nm)          | HOMO→LUMO+1                        | 0.684 (94%) | 0.0762              |
| <i>(S,M)</i> - <b>1</b> | $S_1$ | 2.42 (511 nm)          | HOMO→LUMO                          | 0.697 (97%) | 0.0596              |
|                         | $S_2$ | 2.81 (441 nm)          | HOMO→LUMO+1                        | 0.676 (91%) | 0.0893              |
| <i>(S)</i> - <b>2</b>   | $S_1$ | 2.46 (503 nm)          | HOMO→LUMO                          | 0.695 (97%) | 0.0729              |
|                         | $S_2$ | 3.01 (411 nm)          | HOMO→LUMO+1                        | 0.650 (85%) | 0.0596              |

[a] Estimated by TD-DFT (B3LYP/6-31G\*, LanL2DZ) calculations based on the optimized geometries. [b] Molecular orbitals are shown in Fig. S16 and S17.

**Table S4.** Selected data for excitation energy, major configuration and coefficient for **1** and **2** (for the geometries optimized in the  $T_1$  state).<sup>[a]</sup>

| Compound                | State | Excitation energy [eV] | Major configuration <sup>[b]</sup> | Coefficient |
|-------------------------|-------|------------------------|------------------------------------|-------------|
| <i>(S,P)</i> - <b>1</b> | $T_1$ | 2.08 (597 nm)          | HOMO→LUMO                          | 0.616 (76%) |
| <i>(S,M)</i> - <b>1</b> | $T_1$ | 2.11 (589 nm)          | HOMO→LUMO+1                        | 0.613 (75%) |
|                         |       |                        | HOMO→LUMO                          | 0.287 (16%) |
| <i>(S)</i> - <b>2</b>   | $T_1$ | 2.17 (571 nm)          | HOMO→LUMO                          | 0.521 (54%) |

[a] Estimated by TD-DFT (B3LYP/6-31G\*, LanL2DZ) calculations based on the optimized geometries. [b] Molecular orbitals are shown in Fig. S18 and S19.

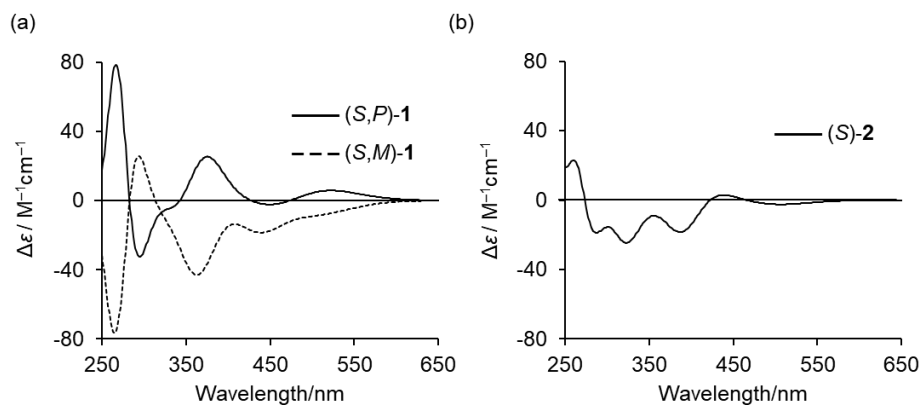

**Fig. S21** Theoretical CD spectra of (a) (*S,P*)-**1** and (b) (*S*)-**2** estimated by TD-DFT calculation (B3LYP/6-31G\*, LanL2DZ, Half-Width = 0.2 eV).

**Table S5.** Peak information for theoretical CD spectra of (*S,P*)-**1**.<sup>[a]</sup>

| Wavelength [nm] | $\Delta\epsilon$ [ $M^{-1}cm^{-1}$ ] | $R_{vel}$ [ $10^{-40}$ esu <sup>2</sup> cm <sup>2</sup> ] |
|-----------------|--------------------------------------|-----------------------------------------------------------|
| 518.18          | 24.94                                | 314.5                                                     |
| 447.87          | -15.81                               | -230.7                                                    |
| 426.7           | 8.17                                 | 125.1                                                     |
| 398.95          | -8.12                                | -133.0                                                    |
| 389.88          | 6.51                                 | 109.1                                                     |
| 380.07          | 24.00                                | 412.8                                                     |
| 371.54          | 51.90                                | 913.0                                                     |
| 359.91          | 22.93                                | 416.4                                                     |
| 356.88          | -6.30                                | -115.4                                                    |
| 354.69          | -33.07                               | -609.3                                                    |
| 344.42          | 51.58                                | 978.8                                                     |
| 338.7           | -70.42                               | -1359.0                                                   |
| 333.38          | 25.42                                | 498.4                                                     |
| 327.21          | 2.97                                 | 59.3                                                      |
| 323.37          | -9.44                                | -190.9                                                    |
| 316.55          | 3.69                                 | 76.2                                                      |
| 309.55          | -10.80                               | -228.0                                                    |
| 307.45          | 93.75                                | 1992.9                                                    |
| 306.14          | -91.35                               | -1950.2                                                   |
| 303.83          | 2.79                                 | 60.0                                                      |
| 302.27          | -32.67                               | -706.4                                                    |
| 299.38          | 16.16                                | 352.8                                                     |



|        |        |         |
|--------|--------|---------|
| 295.34 | 3.39   | 75.0    |
| 294.75 | 7.91   | 175.5   |
| 292.06 | -12.13 | -271.5  |
| 290.48 | -12.35 | -278.0  |
| 289.8  | -27.22 | -614.0  |
| 287.63 | -22.22 | -504.9  |
| 286.48 | -10.44 | -238.2  |
| 285.74 | 16.92  | 387.0   |
| 284.28 | 2.20   | 50.6    |
| 283.8  | -3.05  | -70.2   |
| 281.51 | -36.58 | -849.3  |
| 277.76 | -7.28  | -171.3  |
| 276.06 | 15.20  | 359.8   |
| 275.62 | -30.82 | -730.9  |
| 274.16 | 7.59   | 181.0   |
| 273.56 | 65.36  | 1561.7  |
| 271.97 | 18.64  | 448.0   |
| 270.51 | 48.04  | 1160.7  |
| 269.31 | 4.81   | 116.8   |
| 266.86 | -3.93  | -96.2   |
| 266.35 | 7.83   | 192.1   |
| 264.41 | 90.09  | 2226.9  |
| 263.97 | -56.38 | -1396.1 |
| 263.64 | 14.10  | 349.7   |
| 262.19 | 24.32  | 606.4   |
| 260.64 | -32.79 | -822.3  |
| 258.28 | 75.05  | 1899.2  |
| 256.59 | -35.88 | -914.0  |

---

[a] Estimated by TD-DFT (B3LYP/6-31G\*, LanL2DZ) calculations based on the optimized geometries.

**Table S6.** Peak information for theoretical CD spectra of (*S,M*)-**1**.<sup>[a]</sup>

| Wavelength [nm] | $\Delta\varepsilon$ [ $M^{-1}cm^{-1}$ ] | $R_{vel}$ [ $10^{-40}$ esu <sup>2</sup> cm <sup>2</sup> ] |
|-----------------|-----------------------------------------|-----------------------------------------------------------|
| 510.82          | -28.68                                  | -360.3                                                    |
| 440.5           | -50.66                                  | -738.1                                                    |
| 424.07          | -14.64                                  | -221.6                                                    |
| 394.51          | 12.01                                   | 195.4                                                     |
| 383.39          | -4.06                                   | -67.9                                                     |
| 378.62          | -24.80                                  | -420.4                                                    |
| 366.88          | -61.49                                  | -1075.7                                                   |
| 358.22          | -16.13                                  | -288.9                                                    |
| 353.26          | -8.96                                   | -162.8                                                    |
| 351.34          | -25.17                                  | -459.7                                                    |
| 338.63          | 10.75                                   | 203.8                                                     |
| 337.84          | -12.75                                  | -242.3                                                    |
| 332.88          | -9.46                                   | -182.4                                                    |
| 324.63          | -4.57                                   | -90.4                                                     |
| 320.69          | 3.41                                    | 68.3                                                      |
| 313.31          | -10.66                                  | -218.4                                                    |
| 309.03          | 0.54                                    | 11.3                                                      |
| 307.66          | -40.80                                  | -851.0                                                    |
| 305.05          | 83.46                                   | 1756.0                                                    |
| 303.6           | -35.16                                  | -743.3                                                    |
| 299.96          | 16.91                                   | 361.8                                                     |
| 299.41          | -12.57                                  | -269.4                                                    |
| 295.96          | 3.79                                    | 82.1                                                      |
| 293.39          | -2.34                                   | -51.2                                                     |
| 291.03          | -12.47                                  | -275.0                                                    |
| 288.84          | 0.91                                    | 20.3                                                      |
| 288.47          | 47.16                                   | 1049.2                                                    |
| 287.5           | -1.99                                   | -44.4                                                     |
| 285.77          | 8.50                                    | 190.9                                                     |
| 283.55          | 62.79                                   | 1421.2                                                    |
| 281.11          | -0.50                                   | -11.5                                                     |
| 280.28          | -1.60                                   | -36.7                                                     |
| 277.75          | -22.75                                  | -525.6                                                    |
| 275.87          | 1.16                                    | 27.0                                                      |

|        |        |         |
|--------|--------|---------|
| 274.57 | 12.51  | 292.4   |
| 273.91 | -83.63 | -1959.6 |
| 273.27 | -25.05 | -588.3  |
| 271.23 | 0.41   | 9.6     |
| 269.39 | 40.70  | 969.6   |
| 268.92 | -47.08 | -1123.6 |
| 266.82 | 0.86   | 20.6    |
| 265.82 | -16.70 | -403.1  |
| 264.95 | 7.30   | 176.9   |
| 263.53 | -5.93  | -144.5  |
| 262.99 | -47.42 | -1157.2 |
| 261.65 | -6.75  | -165.7  |
| 260.5  | 41.16  | 1014.0  |
| 258.82 | -43.47 | -1077.8 |
| 257.24 | -18.01 | -449.3  |
| 256.91 | -22.80 | -569.6  |

---

[a] Estimated by TD-DFT (B3LYP/6-31G\*, LanL2DZ) calculations based on the optimized geometries.

**Table S7.** Peak information for theoretical CD spectra of (S)-**2**.<sup>[a]</sup>

| Wavelength [nm] | $\Delta\varepsilon$ [ $M^{-1}cm^{-1}$ ] | $R_{vel}$ [ $10^{-40}$ esu <sup>2</sup> cm <sup>2</sup> ] |
|-----------------|-----------------------------------------|-----------------------------------------------------------|
| 503.49          | -10.08                                  | -117.7                                                    |
| 411.33          | 53.56                                   | 765.1                                                     |
| 396.82          | -79.78                                  | -1181.3                                                   |
| 387.08          | -11.31                                  | -171.7                                                    |
| 353.73          | -8.39                                   | -139.3                                                    |
| 350.92          | -1.63                                   | -27.2                                                     |
| 338.51          | 8.23                                    | 142.9                                                     |
| 326.8           | -49.86                                  | -896.6                                                    |
| 316.54          | -11.54                                  | -214.3                                                    |
| 314.1           | -1.55                                   | -29.0                                                     |
| 310.94          | -11.38                                  | -215.0                                                    |
| 302.7           | 10.35                                   | 200.9                                                     |
| 297.19          | -1.33                                   | -26.3                                                     |
| 296.74          | 3.93                                    | 77.8                                                      |
| 294.76          | -2.64                                   | -52.6                                                     |
| 292.61          | -23.14                                  | -464.7                                                    |
| 286.81          | 1.84                                    | 37.8                                                      |
| 284.04          | -5.23                                   | -108.2                                                    |
| 283.54          | -9.92                                   | -205.6                                                    |
| 281.13          | -0.34                                   | -7.0                                                      |
| 280.48          | -5.59                                   | -117.2                                                    |
| 277.91          | 13.18                                   | 278.7                                                     |
| 275.42          | -26.80                                  | -571.8                                                    |
| 274.89          | -8.27                                   | -176.9                                                    |
| 273.88          | 4.42                                    | 94.9                                                      |
| 270.75          | -14.63                                  | -317.4                                                    |
| 267.37          | -41.95                                  | -922.0                                                    |
| 266.55          | 90.31                                   | 1990.7                                                    |
| 263.4           | 3.76                                    | 83.9                                                      |
| 261.59          | 2.87                                    | 64.6                                                      |
| 260.55          | 20.53                                   | 463.0                                                     |
| 259.04          | 0.27                                    | 6.0                                                       |
| 255.95          | -8.92                                   | -204.7                                                    |
| 251.76          | -1.34                                   | -31.2                                                     |

|        |        |        |
|--------|--------|--------|
| 247.68 | -1.64  | -38.9  |
| 244.41 | 7.58   | 182.2  |
| 244.03 | 26.59  | 640.3  |
| 243.4  | -24.14 | -582.7 |
| 242.92 | 26.81  | 648.6  |
| 241.65 | 11.89  | 289.1  |
| 241.27 | -19.49 | -474.7 |
| 240.66 | -6.45  | -157.6 |
| 238.81 | -2.14  | -52.7  |
| 236.33 | 14.36  | 357.1  |
| 235.87 | -23.11 | -575.8 |
| 234.49 | 7.47   | 187.2  |
| 234.12 | 46.24  | 1160.6 |
| 233.67 | 11.04  | 277.7  |
| 231.95 | -12.61 | -319.5 |
| 231.12 | 4.70   | 119.5  |

---

[a] Estimated by TD-DFT (B3LYP/6-31G\*, LanL2DZ) calculations based on the optimized geometries.

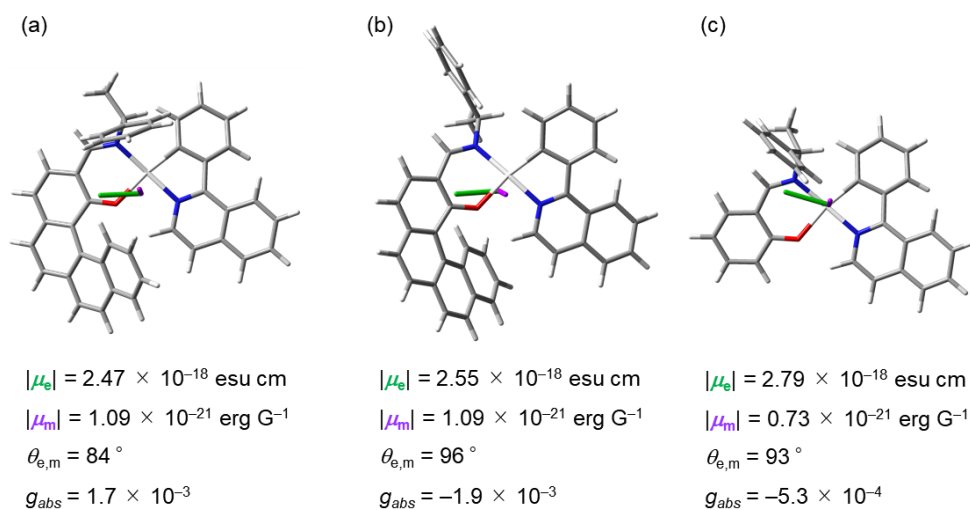

**Fig. S22** Electric ( $\mu_e$ , orange) and magnetic ( $\mu_m$ , purple) dipole moments of the  $S_0$ -to- $S_1$  transition for (a) *(S,P)*-1, (b) *(S,M)*-1 and (c) *(S)*-2 calculated at the B3LYP/6-31G\*/LanL2DZ level. Calculated values of transition dipole moments ( $|\mu_e|$ ,  $|\mu_m|$  and  $\theta_{e,m}$ ) and  $g_{abs}$  are given under each structure.

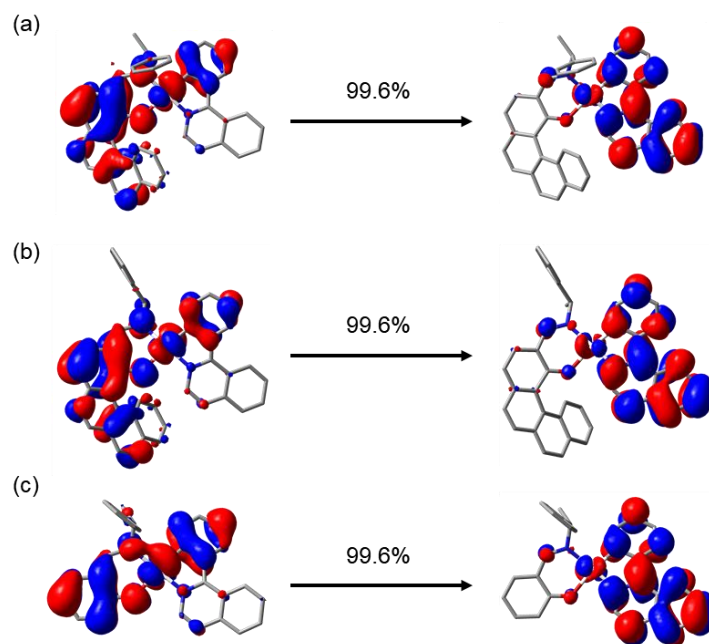

**Fig. S23** NTO analysis of the  $S_0 \rightarrow S_1$  transition for (a) *(S,P)*-1, (b) *(S,M)*-1 and (c) *(S)*-2 as obtained from DFT calculations (B3LYP/6-31G\*, LanL2DZ).

## 7. Cartesian Coordinates (in Å)

**Table S8.** Cartesian coordinates (in angstrom) of (*S,P*)-**1** in the  $S_0$  state<sup>[a]</sup>.

| atom | x         | y         | z         |
|------|-----------|-----------|-----------|
| Pt   | -0.795838 | -0.58009  | -0.624634 |
| O    | 1.29384   | -0.253527 | -0.319687 |
| N    | -1.192468 | 1.429436  | -0.559063 |
| N    | -0.419979 | -2.584421 | -0.438832 |
| C    | -0.212488 | 2.340146  | -0.302115 |
| H    | 0.793908  | 1.941545  | -0.302978 |
| C    | 3.617913  | -0.568249 | -0.704071 |
| C    | 5.183064  | 1.32876   | -0.791551 |
| C    | -3.349776 | 0.698418  | -1.117872 |
| C    | 2.241084  | -1.062619 | -0.644937 |
| C    | -2.497131 | 1.777157  | -0.600582 |
| C    | 3.738886  | 2.831109  | 1.112799  |
| C    | 0.755376  | -3.091766 | -0.708739 |
| H    | 0.829678  | -4.179886 | -0.690305 |
| C    | -2.709021 | -0.576062 | -1.200219 |
| C    | 4.776354  | 3.442925  | 0.343204  |
| H    | 5.01468   | 4.488718  | 0.521619  |
| C    | 4.027612  | 0.735608  | -0.212062 |
| C    | -4.686577 | -1.414202 | -2.373115 |
| H    | -5.193453 | -2.235495 | -2.874768 |
| C    | 6.043219  | 0.556118  | -1.624934 |
| H    | 6.937656  | 1.028303  | -2.024573 |
| C    | 5.512176  | 2.695508  | -0.524934 |
| H    | 6.365175  | 3.126732  | -1.043632 |
| C    | 4.555406  | -1.347187 | -1.445493 |
| C    | 3.396852  | 1.458449  | 0.886023  |
| C    | -0.499873 | 3.656146  | -0.061916 |
| H    | 0.305704  | 4.362236  | 0.110512  |
| C    | -1.852671 | 4.06824   | 0.036958  |
| C    | 2.541915  | 0.840828  | 1.836172  |
| H    | 2.344254  | -0.218841 | 1.764022  |
| C    | -4.228253 | 3.479608  | 0.084523  |
| H    | -5.013739 | 2.737089  | 0.044168  |
| C    | -2.884656 | 3.097797  | -0.186502 |
| C    | -2.206318 | 5.394741  | 0.398088  |
| H    | -1.412305 | 6.12296   | 0.541359  |
| C    | -4.62377  | 0.892188  | -1.684271 |
| H    | -5.070388 | 1.878443  | -1.71581  |
| C    | -1.367463 | -3.390184 | 1.711056  |
| C    | -3.404225 | -1.604905 | -1.854282 |
| H    | -2.925881 | -2.568412 | -2.003828 |
| C    | -2.480965 | -2.963634 | 2.444185  |

|   |           |           |           |
|---|-----------|-----------|-----------|
| H | -3.378196 | -2.649112 | 1.916492  |
| C | 1.994713  | -2.434667 | -0.984167 |
| C | -4.53855  | 4.768179  | 0.462426  |
| H | -5.570118 | 5.032018  | 0.67736   |
| C | -5.300451 | -0.16321  | -2.288738 |
| H | -6.281763 | 0.001143  | -2.724905 |
| C | -3.523261 | 5.743859  | 0.592841  |
| H | -3.783256 | 6.759571  | 0.87785   |
| C | -1.451182 | -3.46074  | 0.18602   |
| H | -2.405953 | -3.021895 | -0.093862 |
| C | 3.041422  | -3.231476 | -1.532511 |
| H | 2.828402  | -4.270207 | -1.777533 |
| C | 5.783271  | -0.760568 | -1.870047 |
| H | 6.475211  | -1.366608 | -2.449289 |
| C | 4.263292  | -2.694394 | -1.814278 |
| H | 5.030306  | -3.276453 | -2.316931 |
| C | 1.972927  | 1.554242  | 2.873109  |
| H | 1.328928  | 1.042899  | 3.583282  |
| C | -1.452149 | -4.91608  | -0.314819 |
| H | -1.461415 | -4.956415 | -1.410225 |
| H | -2.357412 | -5.408008 | 0.055012  |
| H | -0.601801 | -5.499643 | 0.051882  |
| C | 3.108843  | 3.552556  | 2.15845   |
| H | 3.368659  | 4.600386  | 2.292998  |
| C | -2.449046 | -2.929594 | 3.840062  |
| H | -3.323402 | -2.593504 | 4.391263  |
| C | 2.228481  | 2.93303   | 3.020543  |
| H | 1.764202  | 3.491892  | 3.828839  |
| C | -0.213666 | -3.775602 | 2.406625  |
| H | 0.670009  | -4.096132 | 1.860452  |
| C | -0.176532 | -3.739635 | 3.800463  |
| H | 0.728156  | -4.039109 | 4.323127  |
| C | -1.296072 | -3.318268 | 4.522619  |
| H | -1.266353 | -3.289452 | 5.608571  |

---

[a] The geometry was optimized by DFT calculation (B3LYP/6-31G\*, LanL2DZ).



**Table S9.** Cartesian coordinates (in angstrom) of (*S,M*)-**1** in the  $S_0$  state<sup>[a]</sup>.

| atom | x         | y         | z         |
|------|-----------|-----------|-----------|
| Pt   | 0.69798   | 0.514764  | -0.100048 |
| O    | -0.632777 | -1.155331 | -0.011542 |
| N    | -0.876945 | 1.791035  | -0.416897 |
| N    | 2.207957  | -0.758474 | 0.446607  |
| C    | -2.161837 | 1.341621  | -0.473538 |
| H    | -2.268832 | 0.265187  | -0.494212 |
| C    | -1.402314 | -3.378821 | -0.358503 |
| C    | -3.741531 | -3.863913 | -0.9487   |
| C    | 0.846979  | 3.370599  | -0.586709 |
| C    | -0.334165 | -2.401142 | -0.144759 |
| C    | -0.584655 | 3.109236  | -0.396152 |
| C    | -4.75424  | -1.727038 | 0.59324   |
| C    | 2.11563   | -2.05735  | 0.303845  |
| H    | 3.00998   | -2.62457  | 0.572032  |
| C    | 1.686144  | 2.21874   | -0.472145 |
| C    | -5.597312 | -2.41391  | -0.334384 |
| H    | -6.639939 | -2.116265 | -0.415675 |
| C    | -2.815119 | -3.077836 | -0.209791 |
| C    | 3.560175  | 3.61133   | -1.211337 |
| H    | 4.615173  | 3.691522  | -1.463191 |
| C    | -3.310516 | -5.059501 | -1.594103 |
| H    | -4.048842 | -5.657053 | -2.123685 |
| C    | -5.11911  | -3.484921 | -1.025971 |
| H    | -5.777124 | -4.074751 | -1.659781 |
| C    | -1.025364 | -4.641052 | -0.905955 |
| C    | -3.372737 | -2.089502 | 0.705209  |
| C    | -3.224563 | 2.203101  | -0.497248 |
| H    | -4.234056 | 1.812858  | -0.572287 |
| C    | -2.999506 | 3.593571  | -0.338623 |
| C    | -2.649899 | -1.549548 | 1.801057  |
| H    | -1.637113 | -1.879463 | 1.982486  |
| C    | -1.442081 | 5.429526  | 0.102728  |
| H    | -0.441846 | 5.783746  | 0.312671  |
| C    | -1.648561 | 4.062025  | -0.231849 |
| C    | -4.071154 | 4.518411  | -0.232333 |
| H    | -5.087891 | 4.149387  | -0.338862 |
| C    | 1.372288  | 4.595257  | -1.040211 |
| H    | 0.719919  | 5.438823  | -1.229218 |
| C    | 3.0388    | 2.379824  | -0.807973 |
| H    | 3.709337  | 1.527951  | -0.794102 |
| C    | 1.020456  | -2.867011 | -0.122674 |
| C    | -2.504507 | 6.298327  | 0.229696  |

|   |           |           |           |
|---|-----------|-----------|-----------|
| H | -2.322517 | 7.334461  | 0.500313  |
| C | 2.726686  | 4.723719  | -1.331789 |
| H | 3.118449  | 5.673856  | -1.683895 |
| C | -3.830104 | 5.847499  | 0.031578  |
| H | -4.657488 | 6.546099  | 0.120542  |
| C | 3.381954  | -0.269155 | 1.23478   |
| H | 3.417401  | 0.805352  | 1.056033  |
| C | 1.316244  | -4.216914 | -0.473875 |
| H | 2.353264  | -4.544619 | -0.44345  |
| C | -2.015598 | -5.478456 | -1.498177 |
| H | -1.703534 | -6.426595 | -1.92853  |
| C | 0.338639  | -5.060198 | -0.914124 |
| H | 0.576692  | -6.057316 | -1.27309  |
| C | -3.217463 | -0.632731 | 2.664271  |
| H | -2.634635 | -0.250101 | 3.497742  |
| C | -5.301043 | -0.751195 | 1.464813  |
| H | -6.346868 | -0.477353 | 1.343136  |
| C | -4.546497 | -0.199826 | 2.479054  |
| H | -4.981461 | 0.533921  | 3.152512  |
| C | 4.713139  | -0.860521 | 0.759801  |
| C | 4.999946  | -0.916617 | -0.615803 |
| C | 5.696935  | -1.299009 | 1.655494  |
| C | 6.228599  | -1.38654  | -1.076371 |
| H | 4.244262  | -0.606711 | -1.33202  |
| C | 6.93046   | -1.770405 | 1.195857  |
| H | 5.511184  | -1.27551  | 2.724073  |
| C | 7.202425  | -1.81477  | -0.17039  |
| H | 6.424038  | -1.420894 | -2.144951 |
| H | 7.676189  | -2.10513  | 1.912252  |
| H | 8.160551  | -2.182232 | -0.527826 |
| C | 3.08505   | -0.455125 | 2.729995  |
| H | 2.103481  | -0.027627 | 2.954009  |
| H | 3.072317  | -1.514358 | 3.011796  |
| H | 3.828556  | 0.061848  | 3.345714  |

---

[a] The geometry was optimized by DFT calculation (B3LYP/6-31G\*, LanL2DZ).

**Table S10.** Cartesian coordinates (in angstrom) of (*S*)-**2** in the  $S_0$  state<sup>[a]</sup>.

| atom | x         | y         | z         |
|------|-----------|-----------|-----------|
| Pt   | 0.008713  | 0.26089   | -0.473148 |
| O    | 0.67565   | 2.221641  | -0.007054 |
| C    | -1.001388 | -1.358131 | -1.101153 |
| C    | 3.008952  | 1.900858  | -0.51009  |
| C    | 1.858833  | 2.707104  | -0.215365 |
| C    | 3.044934  | -2.083058 | 0.894229  |
| N    | -1.915333 | 0.8453    | -0.063022 |
| C    | -4.433653 | 1.431019  | 0.977823  |
| C    | -2.40038  | -1.324615 | -0.803718 |
| C    | 2.979634  | 0.472772  | -0.552501 |
| H    | 3.970421  | 0.014112  | -0.542957 |
| C    | 4.273252  | 2.526665  | -0.682232 |
| H    | 5.135793  | 1.894987  | -0.88676  |
| C    | -4.114099 | 0.096203  | 0.564556  |
| C    | -5.039826 | -0.937647 | 0.877352  |
| H    | -4.772527 | -1.969112 | 0.691028  |
| N    | 1.969665  | -0.357563 | -0.56359  |
| C    | -6.248522 | -0.651949 | 1.475549  |
| H    | -6.932919 | -1.459881 | 1.717802  |
| C    | -0.560418 | -2.388828 | -1.945438 |
| H    | 0.476419  | -2.425874 | -2.256754 |
| C    | 2.315091  | -1.900456 | 2.08064   |
| H    | 1.284072  | -1.560442 | 2.020415  |
| C    | 2.898552  | -2.137598 | 3.322927  |
| H    | 2.316556  | -1.98881  | 4.228676  |
| C    | -2.846393 | -0.132355 | -0.075388 |
| C    | 3.111742  | -2.286353 | -1.680886 |
| H    | 3.265547  | -3.369913 | -1.638838 |
| H    | 2.542607  | -2.051855 | -2.58525  |
| H    | 4.092689  | -1.810738 | -1.781634 |
| C    | 2.05436   | 4.116797  | -0.119285 |
| H    | 1.183485  | 4.724024  | 0.109175  |
| C    | -3.44615  | 2.439033  | 0.834141  |
| H    | -3.657868 | 3.459493  | 1.137572  |
| C    | 4.371477  | -2.518837 | 0.988748  |
| H    | 4.959808  | -2.683814 | 0.091301  |
| C    | 4.426905  | 3.893705  | -0.602896 |
| H    | 5.39989   | 4.352447  | -0.748282 |
| C    | -2.20196  | 2.103629  | 0.375309  |
| H    | -1.370333 | 2.795981  | 0.327486  |
| C    | 4.958644  | -2.760185 | 2.235305  |
| H    | 5.99      | -3.099685 | 2.285844  |

|   |           |           |           |
|---|-----------|-----------|-----------|
| C | -5.698035 | 1.698643  | 1.563749  |
| H | -5.932798 | 2.720591  | 1.849872  |
| C | -2.791723 | -3.306082 | -2.160082 |
| H | -3.477822 | -4.034057 | -2.583683 |
| C | -1.428304 | -3.358471 | -2.452206 |
| H | -1.041686 | -4.137621 | -3.105297 |
| C | 2.3469    | -1.809476 | -0.43962  |
| H | 1.397624  | -2.340451 | -0.407857 |
| C | 3.294176  | 4.688002  | -0.316287 |
| H | 3.401356  | 5.768069  | -0.244021 |
| C | -3.275525 | -2.278858 | -1.356672 |
| H | -4.346015 | -2.190648 | -1.217478 |
| C | -6.595529 | 0.680759  | 1.795172  |
| H | -7.557392 | 0.893871  | 2.25324   |
| C | 4.226126  | -2.569093 | 3.405152  |
| H | 4.68196   | -2.756538 | 4.373694  |

---

[a] The geometry was optimized by DFT calculation (B3LYP/6-31G\*, LanL2DZ).

**Table S11.** Cartesian coordinates (in angstrom) of (*S,P*)-**1** in the T<sub>1</sub> state<sup>[a]</sup>.

| atom | x         | y         | z         |
|------|-----------|-----------|-----------|
| Pt   | -0.842408 | -0.613567 | -0.550524 |
| O    | 1.232995  | -0.292773 | -0.173851 |
| N    | -1.27461  | 1.399191  | -0.430438 |
| N    | -0.428201 | -2.58669  | -0.460469 |
| C    | -0.320349 | 2.313818  | -0.103441 |
| H    | 0.690858  | 1.929056  | -0.063762 |
| C    | 3.491243  | -0.364659 | -0.908365 |
| C    | 4.94012   | 1.626804  | -1.021383 |
| C    | -3.399324 | 0.64295   | -1.085255 |
| C    | 2.190404  | -0.962527 | -0.734578 |
| C    | -2.579757 | 1.73022   | -0.523892 |
| C    | 3.647486  | 2.884442  | 1.166352  |
| C    | 0.742125  | -3.061868 | -0.951    |
| H    | 0.78261   | -4.125184 | -1.178971 |
| C    | -2.745599 | -0.624421 | -1.149449 |
| C    | 4.537808  | 3.620244  | 0.321651  |
| H    | 4.729878  | 4.66608   | 0.55049   |
| C    | 3.892956  | 0.916015  | -0.350084 |
| C    | -4.701071 | -1.510823 | -2.314869 |
| H    | -5.200099 | -2.348763 | -2.796112 |
| C    | 5.742503  | 0.989426  | -2.001124 |
| H    | 6.551466  | 1.548904  | -2.46249  |
| C    | 5.202126  | 2.995685  | -0.688322 |
| H    | 5.949448  | 3.527785  | -1.272062 |
| C    | 4.411621  | -1.020075 | -1.798304 |
| C    | 3.363638  | 1.51046   | 0.870732  |
| C    | -0.635952 | 3.620702  | 0.152864  |
| H    | 0.151226  | 4.332257  | 0.379723  |
| C    | -1.996728 | 4.013719  | 0.193223  |
| C    | 2.669404  | 0.772215  | 1.86535   |
| H    | 2.51817   | -0.289136 | 1.73131   |
| C    | -4.36484  | 3.397832  | 0.111899  |
| H    | -5.139076 | 2.648575  | 0.01922   |
| C    | -3.004842 | 3.035862  | -0.101461 |
| C    | -2.383576 | 5.328344  | 0.564566  |
| H    | -1.606186 | 6.061651  | 0.762269  |
| C    | -4.662291 | 0.814721  | -1.679455 |
| H    | -5.119654 | 1.794875  | -1.735263 |
| C    | -1.019257 | -3.516825 | 1.75143   |
| C    | -3.423675 | -1.679992 | -1.774711 |
| H    | -2.937627 | -2.645529 | -1.875079 |
| C    | -1.985509 | -3.090732 | 2.670574  |

|   |           |           |           |
|---|-----------|-----------|-----------|
| H | -2.947771 | -2.736932 | 2.307627  |
| C | 1.930091  | -2.344578 | -1.199487 |
| C | -4.708056 | 4.67419   | 0.501179  |
| H | -5.751871 | 4.921779  | 0.671605  |
| C | -5.318335 | -0.259972 | -2.276107 |
| H | -6.292561 | -0.111336 | -2.73334  |
| C | -3.712235 | 5.658523  | 0.701582  |
| H | -3.998348 | 6.664754  | 0.994897  |
| C | -1.338105 | -3.508189 | 0.25511   |
| H | -2.334278 | -3.076868 | 0.148454  |
| C | 2.974031  | -3.006079 | -1.897586 |
| H | 2.811996  | -4.027743 | -2.232588 |
| C | 5.531099  | -0.336429 | -2.3107   |
| H | 6.190136  | -0.856124 | -3.002312 |
| C | 4.140758  | -2.357157 | -2.219807 |
| H | 4.887279  | -2.862368 | -2.828807 |
| C | 2.197825  | 1.369901  | 3.019307  |
| H | 1.677435  | 0.765159  | 3.757067  |
| C | -1.395366 | -4.935154 | -0.321406 |
| H | -1.584278 | -4.91727  | -1.401069 |
| H | -2.215731 | -5.474854 | 0.162689  |
| H | -0.480442 | -5.505871 | -0.135858 |
| C | 3.11828   | 3.484033  | 2.334363  |
| H | 3.333002  | 4.534566  | 2.519043  |
| C | -1.72726  | -3.1114   | 4.04305   |
| H | -2.491146 | -2.77773  | 4.74068   |
| C | 2.390976  | 2.746484  | 3.247709  |
| H | 2.001269  | 3.213245  | 4.148383  |
| C | 0.220611  | -3.957201 | 2.236411  |
| H | 0.991158  | -4.275554 | 1.53935   |
| C | 0.483431  | -3.974408 | 3.605965  |
| H | 1.451038  | -4.316264 | 3.964414  |
| C | -0.491186 | -3.553989 | 4.51517   |
| H | -0.285717 | -3.568908 | 5.582279  |

---

[a] The geometry was optimized by DFT calculation (B3LYP/6-31G\*, LanL2DZ).

**Table S12.** Cartesian coordinates (in angstrom) of (*S,M*)-1 in the T<sub>1</sub> state<sup>ab</sup>.

| atom | x         | y         | z         |
|------|-----------|-----------|-----------|
| Pt   | 0.72862   | 0.470126  | -0.029815 |
| O    | -0.639851 | -1.157742 | 0.210905  |
| N    | -0.822573 | 1.79257   | -0.32898  |
| N    | 2.197086  | -0.836688 | 0.466643  |
| C    | -2.122853 | 1.389756  | -0.283267 |
| H    | -2.270205 | 0.319731  | -0.220934 |
| C    | -1.540789 | -3.254003 | -0.460814 |
| C    | -3.896657 | -3.577673 | -1.114383 |
| C    | 0.950929  | 3.289608  | -0.675056 |
| C    | -0.435581 | -2.387029 | -0.142953 |
| C    | -0.483759 | 3.09626   | -0.414993 |
| C    | -4.825665 | -1.57381  | 0.665555  |
| C    | 2.089865  | -2.157766 | 0.197332  |
| H    | 3.005081  | -2.738055 | 0.302351  |
| C    | 1.75624   | 2.122109  | -0.504249 |
| C    | -5.681685 | -2.102659 | -0.352403 |
| H    | -6.70584  | -1.741435 | -0.412929 |
| C    | -2.942188 | -2.917447 | -0.272468 |
| C    | 3.673119  | 3.409755  | -1.308427 |
| H    | 4.732216  | 3.447165  | -1.552246 |
| C    | -3.531071 | -4.710955 | -1.881447 |
| H    | -4.288794 | -5.207352 | -2.481049 |
| C    | -5.249076 | -3.105557 | -1.163907 |
| H    | -5.926304 | -3.574253 | -1.873864 |
| C    | -1.242832 | -4.496581 | -1.124926 |
| C    | -3.464648 | -2.018036 | 0.746388  |
| C    | -3.155214 | 2.287681  | -0.312089 |
| H    | -4.179984 | 1.931331  | -0.304793 |
| C    | -2.873364 | 3.675507  | -0.26875  |
| C    | -2.734894 | -1.638691 | 1.903845  |
| H    | -1.738359 | -2.02909  | 2.053164  |
| C    | -1.232931 | 5.47885   | -0.045718 |
| H    | -0.212294 | 5.810572  | 0.08743   |
| C    | -1.502285 | 4.098582  | -0.266899 |
| C    | -3.906014 | 4.645351  | -0.176543 |
| H    | -4.938726 | 4.307719  | -0.202515 |
| C    | 1.51053   | 4.463483  | -1.210273 |
| H    | 0.88476   | 5.314232  | -1.449795 |
| C    | 3.115656  | 2.22092   | -0.829252 |
| H    | 3.76078   | 1.355116  | -0.738546 |
| C    | 0.955701  | -2.889295 | -0.206839 |
| C    | -2.257155 | 6.393227  | 0.070294  |

|   |           |           |           |
|---|-----------|-----------|-----------|
| H | -2.026016 | 7.438572  | 0.253952  |
| C | 2.868636  | 4.530326  | -1.51217  |
| H | 3.286306  | 5.443203  | -1.927474 |
| C | -3.606442 | 5.979831  | -0.025629 |
| H | -4.403503 | 6.71391   | 0.053282  |
| C | 3.350552  | -0.428751 | 1.303018  |
| H | 3.402859  | 0.659225  | 1.216162  |
| C | 1.151224  | -4.219412 | -0.657962 |
| H | 2.161667  | -4.619752 | -0.682118 |
| C | -2.246219 | -5.209038 | -1.806209 |
| H | -1.977579 | -6.128516 | -2.32112  |
| C | 0.104742  | -4.969121 | -1.140162 |
| H | 0.297619  | -5.952283 | -1.563942 |
| C | -3.274818 | -0.801905 | 2.863042  |
| H | -2.685434 | -0.545022 | 3.739265  |
| C | -5.341571 | -0.684388 | 1.637899  |
| H | -6.372006 | -0.349647 | 1.537762  |
| C | -4.578863 | -0.289144 | 2.719847  |
| H | -4.990074 | 0.381922  | 3.469099  |
| C | 4.694436  | -0.986538 | 0.811403  |
| C | 4.97407   | -1.039923 | -0.565507 |
| C | 5.699823  | -1.390211 | 1.700291  |
| C | 6.214971  | -1.470121 | -1.033784 |
| H | 4.202368  | -0.760886 | -1.276747 |
| C | 6.945219  | -1.820601 | 1.23365   |
| H | 5.521698  | -1.371984 | 2.770136  |
| C | 7.20976   | -1.860809 | -0.13449  |
| H | 6.40225   | -1.503788 | -2.103973 |
| H | 7.706692  | -2.127182 | 1.946207  |
| H | 8.177287  | -2.197036 | -0.497474 |
| C | 3.03063   | -0.739656 | 2.776614  |
| H | 2.046413  | -0.329436 | 3.020203  |
| H | 3.011047  | -1.819179 | 2.962083  |
| H | 3.763772  | -0.279647 | 3.447482  |

---

[a] The geometry was optimized by DFT calculation (B3LYP/6-31G\*, LanL2DZ).



**Table S13.** Cartesian coordinates (in angstrom) of (*S*)-**2** in the T<sub>1</sub> state<sup>[a]</sup>.

| atom | x         | y         | z         |
|------|-----------|-----------|-----------|
| Pt   | 0.010665  | 0.257425  | -0.424506 |
| O    | 0.673469  | 2.193376  | 0.1304    |
| C    | -0.979267 | -1.320442 | -1.124913 |
| C    | 2.982313  | 1.935894  | -0.518822 |
| C    | 1.835467  | 2.708323  | -0.135938 |
| C    | 3.09936   | -2.069706 | 0.849029  |
| N    | -1.880275 | 0.842488  | -0.011793 |
| C    | -4.517949 | 1.38993   | 0.876655  |
| C    | -2.404242 | -1.31636  | -0.788087 |
| C    | 2.984125  | 0.504499  | -0.585441 |
| H    | 3.985063  | 0.068625  | -0.611339 |
| C    | 4.219625  | 2.592044  | -0.746597 |
| H    | 5.081818  | 1.985226  | -1.01703  |
| C    | -4.148432 | 0.034046  | 0.577602  |
| C    | -5.046551 | -0.979779 | 0.942842  |
| H    | -4.75938  | -2.018686 | 0.836892  |
| N    | 1.992064  | -0.342324 | -0.57856  |
| C    | -6.306823 | -0.677135 | 1.488099  |
| H    | -6.980499 | -1.490401 | 1.744069  |
| C    | -0.524168 | -2.329856 | -1.985767 |
| H    | 0.50661   | -2.324575 | -2.318662 |
| C    | 2.36196   | -1.951031 | 2.038658  |
| H    | 1.315718  | -1.659547 | 1.98672   |
| C    | 2.956422  | -2.190266 | 3.275441  |
| H    | 2.368176  | -2.091617 | 4.183918  |
| C    | -2.860905 | -0.199651 | -0.051214 |
| C    | 3.15603   | -2.243207 | -1.728055 |
| H    | 3.328855  | -3.324073 | -1.694285 |
| H    | 2.577883  | -2.012824 | -2.627789 |
| H    | 4.128174  | -1.750833 | -1.831947 |
| C    | 2.008361  | 4.116807  | -0.009605 |
| H    | 1.141571  | 4.698096  | 0.290362  |
| C    | -3.541857 | 2.414465  | 0.665874  |
| H    | -3.781268 | 3.448603  | 0.891104  |
| C    | 4.445278  | -2.444096 | 0.933734  |
| H    | 5.04045   | -2.559896 | 0.033056  |
| C    | 4.350596  | 3.961619  | -0.640077 |
| H    | 5.30401   | 4.444164  | -0.830565 |
| C    | -2.234339 | 2.081663  | 0.291886  |
| H    | -1.436244 | 2.815569  | 0.260031  |
| C    | 5.043484  | -2.687599 | 2.174434  |
| H    | 6.089615  | -2.979447 | 2.21765   |

|   |           |           |           |
|---|-----------|-----------|-----------|
| C | -5.783303 | 1.670249  | 1.415444  |
| H | -6.048852 | 2.705378  | 1.615711  |
| C | -2.728075 | -3.344142 | -2.105307 |
| H | -3.38598  | -4.113838 | -2.500572 |
| C | -1.362432 | -3.337007 | -2.460493 |
| H | -0.970309 | -4.105361 | -3.121544 |
| C | 2.390843  | -1.790978 | -0.477755 |
| H | 1.448559  | -2.335297 | -0.449082 |
| C | 3.223251  | 4.721859  | -0.26431  |
| H | 3.311847  | 5.801565  | -0.167312 |
| C | -3.244074 | -2.35328  | -1.297871 |
| H | -4.310446 | -2.324175 | -1.111311 |
| C | -6.687603 | 0.641634  | 1.707736  |
| H | -7.665025 | 0.874556  | 2.119567  |
| C | 4.302924  | -2.560014 | 3.347998  |
| H | 4.767415  | -2.749426 | 4.311993  |

---

[a] The geometry was optimized by DFT calculation (B3LYP/6-31G\*, LanL2DZ).

## 8. References

- S1. E. Yen-Pon, F. Buttard, L. Frédéric, P. Thuéry, F. Taran, G. Pieters, P. A. Champagne and D. Audisio, *JACS Au*, 2021, **1**, 807.
- S2. D. Kourkoulos, C. Karakus, D. Hertel, R. Alle, S. Schmeding, J. Hummel, N. Risch, E. Holder and K. Meerholz, *Dalton Trans.*, 2013 **42**, 13612.
- S3. P. A. A. M. Vaz, J. Rocha, A. M. S. Silva and S. Guieu, *New J. Chem.*, 2018, **42**, 18166.
- S4. Gaussian 16, Revision C.01, M. J. Frisch, G. W. Trucks, H. B. Schlegel, G. E. Scuseria, M. A. Robb, J. R. Cheeseman, G. Scalmani, V. Barone, G. A. Petersson, H. Nakatsuji, X. Li, M. Caricato, A. V. Marenich, J. Bloino, B. G. Janesko, R. Gomperts, B. Mennucci, H. P. Hratchian, J. V. Ortiz, A. F. Izmaylov, J. L. Sonnenberg, D. Williams-Young, F. Ding, F. Lipparini, F. Egidi, J. Goings, B. Peng, A. Petrone, T. Henderson, D. Ranasinghe, V. G. Zakrzewski, J. Gao, N. Rega, G. Zheng, W. Liang, M. Hada, M. Ehara, K. Toyota, R. Fukuda, J. Hasegawa, M. Ishida, T. Nakajima, Y. Honda, O. Kitao, H. Nakai, T. Vreven, K. Throssell, J. A. Montgomery, Jr., J. E. Peralta, F. Ogliaro, M. J. Bearpark, J. J. Heyd, E. N. Brothers, K. N. Kudin, V. N. Staroverov, T. A. Keith, R. Kobayashi, J. Normand, K. Raghavachari, A. P. Rendell, J. C. Burant, S. S. Iyengar, J. Tomasi, M. Cossi, J. M. Millam, M. Klene, C. Adamo, R. Cammi, J. W. Ochterski, R. L. Martin, K. Morokuma, O. Farkas, J. B. Foresman and D. J. Fox, Gaussian, Inc., Wallingford CT, 2016.
